# Supplementary material for: Genome-wide analysis of long non-coding RNAs in sugar beet (Beta vulgaris L.) under drought stress
Source: Front Plant Sci. 2023 Feb 14;14:1118011. doi: 10.3389/fpls.2023.1118011 (PMC9971629; doi:10.3389/fpls.2023.1118011)
Supplement: Supplementary file 8 [file Table_8.xlsx]

## Sheet: Table S8
##Databases: KEGG PATHWAY
##Statistical test method: hypergeometric test / Fisher's exact test
##FDR correction method: Benjamini and Hochberg
#Term	Database	ID	Input number	Background number	P-Value	Corrected P-Value	Input	Hyperlink
Metabolic pathways	KEGG PATHWAY	ath01100	919	2246	8.49921e-38	1.0794e-35	BVRB_1g007560|BVRB_7g159420|BVRB_2g038590|BVRB_2g032260|BVRB_1g004830|BVRB_9g205450|BVRB_3g057770|BVRB_2g026810|BVRB_1g005120|BVRB_6g148730|BVRB_9g217480|BVRB_5g103790|BVRB_9g224400|BVRB_4g074800|BVRB_9g202650|BVRB_1g004790|BVRB_6g140590|BVRB_1g010630|BVRB_2g027550|BVRB_5g115070|BVRB_5g110510|BVRB_8g186240|BVRB_032280|XLOC_042966|BVRB_4g089130|BVRB_5g103540|BVRB_8g198830|BVRB_1g011320|BVRB_2g0320…	http://www.genome.jp/kegg-bin/show_pathway?ath01100/ath:AT5G03300%09red/ath:AT1G10070%09red/ath:AT2G45310%09red/ath:AT5G38430%09red/ath:AT3G20330%09red/ath:AT5G14220%09red/ath:AT2G40490%09red/ath:AT4G34880%09red/ath:AT4G26210%09red/ath:AT5G42870%09red/ath:AT2G43870%09red/ath:AT5G13630%09red/ath:AT4G13710%09red/ath:AT4G31500%09red/ath:AT1G78380%09red/ath:AT3G10550%09red/ath:AT5G35170%09red/ath:AT1…
Biosynthesis of secondary metabolites	KEGG PATHWAY	ath01110	462	1107	2.31721e-20	1.47143e-18	BVRB_4g096340|BVRB_7g162180|BVRB_1g004830|BVRB_8g198340|BVRB_2g026810|BVRB_5g106550|BVRB_5g103790|BVRB_4g074800|BVRB_9g202650|BVRB_1g004790|BVRB_5g101500|BVRB_1g010630|BVRB_5g110510|XLOC_042966|BVRB_4g089130|BVRB_1g011320|BVRB_1g010850|BVRB_9g215360|BVRB_6g143730|BVRB_9g204220|BVRB_5g118890|BVRB_001630|BVRB_3g061800|BVRB_5g120250|BVRB_5g105330|BVRB_4g088210|BVRB_9g218920|BVRB_1g013210|BVRB_8g2002…	http://www.genome.jp/kegg-bin/show_pathway?ath01110/ath:AT1G10070%09red/ath:AT5G38430%09red/ath:AT1G79550%09red/ath:AT2G40490%09red/ath:AT1G31800%09red/ath:AT5G58770%09red/ath:AT1G02400%09red/ath:AT4G31500%09red/ath:AT5G35170%09red/ath:AT4G33150%09red/ath:AT1G74260%09red/ath:AT4G23730%09red/ath:AT1G22440%09red/ath:AT3G16150%09red/ath:AT4G27070%09red/ath:AT4G37870%09red/ath:AT2G39770%09red/ath:AT2…
Spliceosome	KEGG PATHWAY	ath03040	109	192	3.15445e-11	1.33538e-09	BVRB_8g183520|BVRB_000160|BVRB_6g143380|BVRB_9g204430|BVRB_9g213840|BVRB_8g199120|BVRB_6g128420|BVRB_3g070320|BVRB_6g137630|BVRB_2g043580|BVRB_3g064510|BVRB_4g081400|BVRB_005130|BVRB_6g149070|BVRB_7g174160|BVRB_3g068590|BVRB_4g090780|BVRB_2g036730|BVRB_4g093620|BVRB_3g060640|BVRB_7g179050|BVRB_4g093010|BVRB_8g191100|BVRB_4g085950|BVRB_8g182300|BVRB_2g041080|BVRB_3g069400|BVRB_9g222730|BVRB_3g0596…	http://www.genome.jp/kegg-bin/show_pathway?ath03040/ath:AT5G02500%09red/ath:AT3G26420%09red/ath:AT2G47580%09red/ath:AT5G04280%09red/ath:AT4G25500%09red/ath:AT5G59950%09red/ath:AT1G30480%09red/ath:AT2G38770%09red/ath:AT5G16780%09red/ath:AT1G60170%09red/ath:AT3G19760%09red/ath:AT1G02140%09red/ath:AT3G13224%09red/ath:AT3G55220%09red/ath:AT4G35785%09red/ath:AT1G20920%09red/ath:AT1G65660%09red/ath:AT3…
Carbon metabolism	KEGG PATHWAY	ath01200	127	273	1.26207e-08	4.00708e-07	BVRB_5g114350|BVRB_5g102830|BVRB_6g152330|BVRB_9g224840|BVRB_7g172900|BVRB_2g026810|BVRB_5g106550|BVRB_1g017150|BVRB_7g161000|BVRB_5g101500|BVRB_6g140350|BVRB_2g038890|BVRB_8g195840|BVRB_6g152820|BVRB_3g051150|BVRB_6g128670|BVRB_4g095480|BVRB_2g044720|BVRB_8g189000|BVRB_002340|BVRB_6g143730|BVRB_8g196670|BVRB_1g004430|BVRB_1g015750|BVRB_5g111290|BVRB_6g148110|BVRB_3g059580|BVRB_6g130780|BVRB_0294…	http://www.genome.jp/kegg-bin/show_pathway?ath01200/ath:AT5G50850%09red/ath:AT5G35360%09red/ath:AT4G24620%09red/ath:AT1G79550%09red/ath:AT5G47720%09red/ath:AT4G29130%09red/ath:AT1G13700%09red/ath:AT2G36530%09red/ath:AT3G50520%09red/ath:AT3G52200%09red/ath:AT3G51840%09red/ath:AT1G22170%09red/ath:AT1G18640%09red/ath:AT1G22440%09red/ath:AT3G55440%09red/ath:AT4G37870%09red/ath:AT1G53310%09red/ath:AT5…
Endocytosis	KEGG PATHWAY	ath04144	71	144	4.01109e-06	0.000101469	BVRB_4g084270|BVRB_004630|BVRB_8g199790|BVRB_7g170680|BVRB_9g214200|BVRB_002200|BVRB_9g202230|BVRB_1g019340|BVRB_9g211880|BVRB_6g143400|BVRB_4g097630|BVRB_9g207290|BVRB_7g174160|BVRB_6g130690|BVRB_3g060830|BVRB_005240|BVRB_9g203370|BVRB_6g143380|BVRB_8g193060|BVRB_8g199760|BVRB_2g023550|XLOC_006902|BVRB_1g012390|BVRB_7g176660|BVRB_5g113420|XLOC_042966|BVRB_3g065050|BVRB_6g130220|BVRB_2g037660|BVR…	http://www.genome.jp/kegg-bin/show_pathway?ath04144/ath:AT5G02500%09red/ath:AT1G10600%09red/ath:AT1G13980%09red/ath:AT1G47830%09red/ath:AT1G10630%09red/ath:AT2G31300%09red/ath:AT2G17790%09red/ath:AT3G15730%09red/ath:AT5G47520%09red/ath:AT4G05000%09red/ath:AT2G06530%09red/ath:AT3G47810%09red/ath:AT1G77140%09red/ath:AT4G19003%09red/ath:AT5G09260%09red/ath:AT1G60890%09red/ath:AT4G01710%09red/ath:AT4…
Carbon fixation in photosynthetic organisms	KEGG PATHWAY	ath00710	43	69	4.79383e-06	0.000101469	BVRB_5g114350|BVRB_2g024780|BVRB_2g024290|BVRB_4g094590|BVRB_9g224840|BVRB_2g026810|BVRB_2g038140|BVRB_9g209080|BVRB_7g180280|BVRB_1g017150|BVRB_7g169130|BVRB_4g091040|BVRB_5g110740|BVRB_2g026850|BVRB_2g026820|BVRB_4g095480|BVRB_7g161710|BVRB_4g083630|BVRB_027550|BVRB_5g107370|BVRB_030460|BVRB_8g196670|BVRB_2g026840|BVRB_017280|BVRB_1g011460|BVRB_1g013550|BVRB_1g014260|BVRB_6g141100|BVRB_9g209750…	http://www.genome.jp/kegg-bin/show_pathway?ath00710/ath:AT1G79750%09red/ath:AT5G11520%09red/ath:ArthCp030%09red/ath:AT1G42970%09red/ath:AT3G47520%09red/ath:AT1G79550%09red/ath:AT2G22780%09red/ath:AT1G67090%09red/ath:AT5G61410%09red/ath:AT1G13440%09red/ath:AT5G38430%09red/ath:AT3G55440%09red/ath:AT3G12780%09red/ath:AT1G70580%09red/ath:AT2G13560%09red/ath:AT4G15530%09red/ath:AT4G26530%09red/ath:AT4…
Photosynthesis	KEGG PATHWAY	ath00195	44	77	1.8823e-05	0.000341503	BVRB_021470|BVRB_7g180220|BVRB_4g096780|BVRB_6g150240|BVRB_013660|BVRB_7g176080|BVRB_018110|BVRB_8g186680|BVRB_004160|BVRB_4g072250|BVRB_017690|BVRB_018050|BVRB_7g180210|BVRB_7g176760|BVRB_032280|BVRB_3g065490|BVRB_8g196730|BVRB_4g096020|BVRB_4g094910|XLOC_071397|BVRB_5g110350|BVRB_6g132120|BVRB_012930|BVRB_1g008880|BVRB_9g221000|BVRB_019610|BVRB_6g153560|BVRB_4g086440|BVRB_6g147470|BVRB_5g120370…	http://www.genome.jp/kegg-bin/show_pathway?ath00195/ath:AT1G20340%09red/ath:ArthCp035%09red/ath:AT1G06680%09red/ath:AT1G08380%09red/ath:ArthCp010%09red/ath:AT1G60950%09red/ath:ArthCp017%09red/ath:ArthCp019%09red/ath:ArthCp018%09red/ath:AT1G55670%09red/ath:ArthCp053%09red/ath:AT1G79040%09red/ath:AT4G05180%09red/ath:AT2G27510%09red/ath:AT4G32260%09red/ath:ArthCp028%09red/ath:ArthCp029%09red/ath:AT1…
Glutathione metabolism	KEGG PATHWAY	ath00480	52	102	3.74528e-05	0.000594445	BVRB_1g007560|BVRB_6g130340|BVRB_2g030880|BVRB_7g167680|BVRB_6g151700|BVRB_4g095830|BVRB_2g037990|XLOC_064225|BVRB_009580|BVRB_5g120360|BVRB_9g206010|BVRB_7g179630|BVRB_6g140350|BVRB_7g162820|BVRB_5g114830|BVRB_5g114910|BVRB_2g044150|BVRB_1g016480|BVRB_8g192350|BVRB_5g114850|BVRB_5g114870|BVRB_5g123260|XLOC_017187|BVRB_6g133350|BVRB_4g079860|BVRB_7g161860|BVRB_5g100450|BVRB_5g122980|BVRB_6g130380…	http://www.genome.jp/kegg-bin/show_pathway?ath00480/ath:AT5G13110%09red/ath:AT4G35000%09red/ath:AT3G54660%09red/ath:AT4G31870%09red/ath:AT5G41210%09red/ath:AT2G21790%09red/ath:AT1G10370%09red/ath:AT1G70310%09red/ath:AT3G23580%09red/ath:AT1G17180%09red/ath:AT4G11600%09red/ath:AT1G78380%09red/ath:AT1G07890%09red/ath:AT2G48150%09red/ath:AT2G24200%09red/ath:AT1G44790%09red/ath:AT5G41220%09red/ath:AT4…
Glycerophospholipid metabolism	KEGG PATHWAY	ath00564	50	97	4.2126e-05	0.000594445	BVRB_1g012240|BVRB_6g130960|BVRB_7g177630|BVRB_6g143230|BVRB_5g106830|BVRB_9g206710|BVRB_6g150120|BVRB_9g220180|BVRB_9g209120|BVRB_4g078480|BVRB_7g162520|BVRB_9g212830|XLOC_042966|BVRB_8g200410|BVRB_3g049570|BVRB_5g111890|BVRB_4g094790|BVRB_7g176660|BVRB_2g044420|BVRB_4g089130|BVRB_4g074800|BVRB_3g056060|BVRB_5g113810|BVRB_2g046020|BVRB_8g184180|BVRB_2g037520|BVRB_3g062380|BVRB_3g061220|BVRB_8g19…	http://www.genome.jp/kegg-bin/show_pathway?ath00564/ath:AT2G38670%09red/ath:AT1G13560%09red/ath:AT1G06520%09red/ath:AT4G30580%09red/ath:AT5G40610%09red/ath:AT3G15730%09red/ath:AT5G60620%09red/ath:AT1G80860%09red/ath:AT2G06925%09red/ath:AT5G04040%09red/ath:AT5G42870%09red/ath:AT5G07920%09red/ath:AT3G03310%09red/ath:AT5G08030%09red/ath:AT1G68000%09red/ath:AT3G09560%09red/ath:AT3G57650%09red/ath:AT2…
Glyoxylate and dicarboxylate metabolism	KEGG PATHWAY	ath00630	41	78	0.000143311	0.00173517	BVRB_4g090610|BVRB_001510|BVRB_2g026850|BVRB_5g119210|BVRB_1g005180|BVRB_9g206140|BVRB_2g026810|BVRB_5g106360|BVRB_7g180280|BVRB_9g210550|BVRB_7g169640|BVRB_5g101500|BVRB_4g074740|BVRB_3g049020|BVRB_6g152820|BVRB_3g057650|BVRB_4g094290|BVRB_5g110660|BVRB_6g143730|BVRB_6g128010|BVRB_9g219850|BVRB_2g044720|BVRB_6g127540|BVRB_3g053760|BVRB_027550|BVRB_030460|BVRB_2g026840|BVRB_017280|BVRB_4g096300|B…	http://www.genome.jp/kegg-bin/show_pathway?ath00630/ath:AT2G22780%09red/ath:AT1G12550%09red/ath:ArthCp030%09red/ath:AT3G47520%09red/ath:AT5G26780%09red/ath:AT5G47720%09red/ath:AT1G67090%09red/ath:AT5G14780%09red/ath:AT5G48230%09red/ath:AT5G38430%09red/ath:AT1G32470%09red/ath:AT1G11860%09red/ath:AT5G03860%09red/ath:AT1G70580%09red/ath:AT3G16910%09red/ath:AT4G37930%09red/ath:AT2G35120%09red/ath:AT3…
Glycine, serine and threonine metabolism	KEGG PATHWAY	ath00260	38	70	0.00015029	0.00173517	BVRB_1g009560|BVRB_5g118010|BVRB_2g045290|BVRB_1g005180|BVRB_5g098290|BVRB_6g152820|BVRB_5g106360|BVRB_6g146100|BVRB_4g076880|BVRB_7g161000|BVRB_4g096540|BVRB_5g116230|BVRB_7g169880|BVRB_5g108020|BVRB_3g050790|BVRB_5g116250|BVRB_6g143730|BVRB_6g148180|BVRB_2g044720|BVRB_7g157660|BVRB_8g189000|BVRB_6g127540|BVRB_005510|BVRB_5g098280|BVRB_4g073470|BVRB_5g101500|BVRB_6g130780|BVRB_6g134460|BVRB_5g12…	http://www.genome.jp/kegg-bin/show_pathway?ath00260/ath:AT1G12550%09red/ath:AT2G13360%09red/ath:AT4G29890%09red/ath:AT3G48170%09red/ath:AT5G26780%09red/ath:AT3G50520%09red/ath:AT4G14940%09red/ath:AT4G19710%09red/ath:AT2G17630%09red/ath:AT3G10050%09red/ath:AT5G38530%09red/ath:AT4G12290%09red/ath:AT4G11640%09red/ath:AT1G22170%09red/ath:AT1G32470%09red/ath:AT1G18640%09red/ath:AT1G11860%09red/ath:AT1…
Protein processing in endoplasmic reticulum	KEGG PATHWAY	ath04141	84	211	0.000250887	0.00265522	BVRB_1g009980|BVRB_8g197750|BVRB_8g182160|BVRB_4g090710|BVRB_5g119250|BVRB_4g074880|XLOC_006902|BVRB_4g079200|BVRB_2g025750|BVRB_9g220920|BVRB_3g070560|BVRB_6g143400|BVRB_6g135950|BVRB_2g025830|BVRB_6g151020|BVRB_5g109010|BVRB_8g193040|BVRB_8g185480|BVRB_3g067550|BVRB_8g200470|BVRB_7g174160|BVRB_9g207980|BVRB_8g183250|BVRB_7g165250|BVRB_4g078270|BVRB_3g053350|BVRB_4g075680|BVRB_008740|BVRB_6g1401…	http://www.genome.jp/kegg-bin/show_pathway?ath04141/ath:AT4G02570%09red/ath:AT1G50670%09red/ath:AT4G27670%09red/ath:AT1G32210%09red/ath:AT1G53540%09red/ath:AT3G60540%09red/ath:AT1G08450%09red/ath:AT2G21270%09red/ath:AT3G44110%09red/ath:AT3G46230%09red/ath:AT5G52640%09red/ath:AT5G20570%09red/ath:AT5G43710%09red/ath:AT2G17520%09red/ath:AT5G60640%09red/ath:AT2G47470%09red/ath:AT1G64230%09red/ath:AT4…
RNA transport	KEGG PATHWAY	ath03013	70	171	0.000424581	0.00392672	BVRB_8g189830|BVRB_8g190870|BVRB_7g173200|BVRB_6g131570|BVRB_4g076280|BVRB_1g000820|BVRB_9g204510|BVRB_4g084820|BVRB_4g088830|BVRB_2g036660|BVRB_4g079190|BVRB_1g012660|BVRB_7g173810|BVRB_7g167780|BVRB_3g051110|BVRB_2g027570|BVRB_8g201670|BVRB_7g176330|BVRB_9g214570|BVRB_5g115080|BVRB_3g068410|BVRB_3g050570|BVRB_8g184700|BVRB_3g059730|XLOC_069940|BVRB_6g155720|BVRB_7g169220|BVRB_5g111430|BVRB_7g16…	http://www.genome.jp/kegg-bin/show_pathway?ath03013/ath:AT1G74700%09red/ath:AT2G05120%09red/ath:AT2G32230%09red/ath:AT5G40480%09red/ath:AT1G16610%09red/ath:AT1G45231%09red/ath:AT5G59950%09red/ath:AT1G64350%09red/ath:AT5G05680%09red/ath:AT1G54380%09red/ath:AT3G15610%09red/ath:AT2G03820%09red/ath:AT4G38760%09red/ath:AT2G46290%09red/ath:AT4G11420%09red/ath:AT5G42920%09red/ath:AT1G72560%09red/ath:AT3…
MAPK signaling pathway - plant	KEGG PATHWAY	ath04016	58	134	0.000432866	0.00392672	BVRB_1g004190|BVRB_7g180490|BVRB_5g099870|BVRB_3g056660|BVRB_002600|BVRB_8g180910|BVRB_4g088060|BVRB_6g134600|BVRB_005580|BVRB_4g088910|BVRB_7g175500|BVRB_8g194000|BVRB_8g193560|BVRB_9g215000|BVRB_1g021990|BVRB_1g003320|BVRB_8g199360|BVRB_5g105880|BVRB_4g082390|BVRB_8g197440|BVRB_4g087530|BVRB_1g007720|BVRB_2g033820|BVRB_5g100470|BVRB_1g019210|BVRB_5g099920|BVRB_2g044620|BVRB_8g189020|BVRB_9g2225…	http://www.genome.jp/kegg-bin/show_pathway?ath04016/ath:AT5G47910%09red/ath:AT4G33720%09red/ath:AT4G17870%09red/ath:AT1G32640%09red/ath:AT1G63440%09red/ath:AT5G53160%09red/ath:AT4G33520%09red/ath:AT3G21220%09red/ath:AT5G40440%09red/ath:AT2G40940%09red/ath:AT2G38470%09red/ath:AT3G12500%09red/ath:AT2G26070%09red/ath:AT2G26330%09red/ath:AT5G46330%09red/ath:AT1G01360%09red/ath:AT5G21930%09red/ath:AT4…
2-Oxocarboxylic acid metabolism	KEGG PATHWAY	ath01210	37	74	0.000608812	0.00515461	BVRB_006310|BVRB_6g137390|BVRB_2g037990|BVRB_3g059040|BVRB_9g209080|BVRB_1g005140|BVRB_6g128260|BVRB_9g210550|BVRB_1g005160|BVRB_1g005100|BVRB_5g106060|BVRB_7g169130|BVRB_3g058810|BVRB_1g005120|BVRB_6g152160|BVRB_9g219850|BVRB_1g014510|BVRB_1g006010|BVRB_9g219010|BVRB_006300|BVRB_8g196670|BVRB_4g073530|BVRB_6g137380|BVRB_2g047840|BVRB_1g015750|BVRB_3g068040|BVRB_1g010030|BVRB_5g105330|BVRB_6g1481…	http://www.genome.jp/kegg-bin/show_pathway?ath01210/ath:AT5G65770%09red/ath:AT1G74100%09red/ath:AT2G43090%09red/ath:AT1G10070%09red/ath:AT1G24100%09red/ath:AT4G37670%09red/ath:AT1G80560%09red/ath:AT5G11520%09red/ath:AT4G31500%09red/ath:AT4G35650%09red/ath:AT1G70580%09red/ath:AT2G31810%09red/ath:AT3G58750%09red/ath:AT2G30970%09red/ath:AT1G80600%09red/ath:AT2G44350%09red/ath:AT4G31990%09red/ath:AT5…
Flavonoid biosynthesis	KEGG PATHWAY	ath00941	17	22	0.000657015	0.00521506	BVRB_9g210980|BVRB_1g018740|BVRB_5g123410|BVRB_2g030450|BVRB_1g016260|BVRB_2g042450|BVRB_1g018750|BVRB_6g147850|BVRB_004760|BVRB_9g216210|BVRB_7g175810|BVRB_1g016220|BVRB_1g018770|BVRB_6g130650|BVRB_1g007170|BVRB_6g150930|BVRB_7g169940	http://www.genome.jp/kegg-bin/show_pathway?ath00941/ath:AT2G30490%09red/ath:AT5G48930%09red/ath:AT5G05270%09red/ath:AT3G51240%09red/ath:AT4G34050%09red/ath:AT1G67980%09red/ath:AT5G42800%09red/ath:AT5G13930%09red/ath:AT5G07990%09red/ath:AT4G26220%09red
Glycolysis / Gluconeogenesis	KEGG PATHWAY	ath00010	51	116	0.000703192	0.00525326	BVRB_2g024780|BVRB_6g152970|BVRB_1g007480|BVRB_1g007880|BVRB_8g198340|BVRB_5g116750|BVRB_6g129880|BVRB_002030|BVRB_2g038140|BVRB_1g010250|BVRB_6g134460|BVRB_4g091040|BVRB_3g053760|BVRB_5g122810|BVRB_3g052850|BVRB_2g038890|BVRB_9g224680|BVRB_5g099470|BVRB_7g169880|BVRB_7g160370|BVRB_5g110740|BVRB_2g044760|BVRB_7g172900|BVRB_6g144320|BVRB_7g161710|BVRB_5g103060|XLOC_039551|BVRB_3g066000|BVRB_5g1248…	http://www.genome.jp/kegg-bin/show_pathway?ath00010/ath:AT2G24270%09red/ath:AT1G13440%09red/ath:AT1G23190%09red/ath:AT5G50850%09red/ath:AT1G09870%09red/ath:AT4G24620%09red/ath:AT4G26270%09red/ath:AT1G44170%09red/ath:AT1G79550%09red/ath:AT3G50520%09red/ath:AT4G29130%09red/ath:AT2G22480%09red/ath:AT1G50460%09red/ath:AT2G36530%09red/ath:AT3G01590%09red/ath:AT5G51820%09red/ath:AT1G77120%09red/ath:AT3…
Tyrosine metabolism	KEGG PATHWAY	ath00350	24	40	0.000841219	0.00593527	BVRB_002030|BVRB_7g166040|BVRB_7g177710|BVRB_9g225780|BVRB_5g098290|BVRB_5g118010|BVRB_9g209080|BVRB_8g198760|BVRB_5g108020|BVRB_3g067140|BVRB_4g086200|BVRB_1g019190|BVRB_1g019170|BVRB_6g148180|BVRB_005510|BVRB_5g098280|BVRB_8g196670|BVRB_2g047840|BVRB_1g010740|BVRB_8g198750|BVRB_1g008590|BVRB_7g166210|BVRB_002050|BVRB_2g031080	http://www.genome.jp/kegg-bin/show_pathway?ath00350/ath:AT1G22440%09red/ath:AT5G36160%09red/ath:AT5G11520%09red/ath:AT4G12290%09red/ath:AT2G42490%09red/ath:AT5G54080%09red/ath:AT4G31990%09red/ath:AT2G20340%09red/ath:AT1G77120%09red/ath:AT5G42250%09red/ath:AT2G02390%09red/ath:AT2G30970%09red/ath:AT4G14940%09red/ath:AT5G43940%09red/ath:AT4G15940%09red/ath:AT5G19550%09red
Glycerolipid metabolism	KEGG PATHWAY	ath00561	31	60	0.00108308	0.00723954	BVRB_1g007480|BVRB_2g042760|BVRB_6g143230|BVRB_2g034670|BVRB_8g199240|BVRB_9g206710|BVRB_1g005770|BVRB_4g078480|BVRB_7g162520|BVRB_9g212830|BVRB_7g169880|BVRB_3g049570|BVRB_5g113810|BVRB_3g056060|BVRB_4g080160|BVRB_002140|BVRB_2g034600|BVRB_5g116750|BVRB_3g062380|BVRB_3g061220|BVRB_8g188620|BVRB_3g049580|BVRB_1g022670|BVRB_4g080180|BVRB_3g056610|BVRB_7g170180|BVRB_8g198900|BVRB_3g066480|XLOC_0215…	http://www.genome.jp/kegg-bin/show_pathway?ath00561/ath:AT1G06520%09red/ath:AT4G30580%09red/ath:AT3G09560%09red/ath:AT5G04040%09red/ath:AT5G42870%09red/ath:AT5G07920%09red/ath:AT4G30340%09red/ath:AT4G33030%09red/ath:AT5G60620%09red/ath:AT3G57650%09red/ath:AT1G12640%09red/ath:AT5G63770%09red/ath:AT3G17770%09red/ath:AT5G13640%09red/ath:AT5G08380%09red/ath:AT3G56310%09red/ath:AT3G48000%09red/ath:AT1…
Peroxisome	KEGG PATHWAY	ath04146	40	87	0.0013149	0.0083496	BVRB_2g045290|BVRB_012550|BVRB_5g102830|BVRB_7g176370|BVRB_2g031830|BVRB_2g037990|BVRB_9g208970|BVRB_5g098860|BVRB_7g169640|BVRB_2g037850|BVRB_5g102420|BVRB_4g072500|BVRB_4g082950|BVRB_1g014700|BVRB_4g094290|BVRB_5g117040|BVRB_4g073980|BVRB_3g065110|BVRB_8g190370|BVRB_3g063160|BVRB_8g194870|BVRB_7g172590|BVRB_4g073470|BVRB_1g015750|BVRB_3g068040|BVRB_9g206190|BVRB_3g048640|BVRB_9g221280|BVRB_1g00…	http://www.genome.jp/kegg-bin/show_pathway?ath04146/ath:AT1G03000%09red/ath:AT3G11980%09red/ath:AT5G20070%09red/ath:AT2G26800%09red/ath:AT5G23310%09red/ath:AT4G33790%09red/ath:AT4G05530%09red/ath:AT3G51840%09red/ath:AT2G39970%09red/ath:AT3G12800%09red/ath:AT2G42770%09red/ath:AT1G79810%09red/ath:AT3G23790%09red/ath:AT5G51100%09red/ath:AT1G49430%09red/ath:AT5G27600%09red/ath:AT2G33150%09red/ath:AT5…
Photosynthesis - antenna proteins	KEGG PATHWAY	ath00196	16	22	0.00147357	0.0089116	BVRB_1g004060|BVRB_4g093140|BVRB_002570|BVRB_7g175110|BVRB_005040|BVRB_002590|BVRB_5g105530|BVRB_002580|BVRB_2g047600|BVRB_2g043310|BVRB_8g190730|BVRB_5g114540|BVRB_4g089040|BVRB_1g021010|BVRB_2g033010|BVRB_9g225010	http://www.genome.jp/kegg-bin/show_pathway?ath00196/ath:AT4G10340%09red/ath:AT5G54270%09red/ath:AT1G19150%09red/ath:AT1G29920%09red/ath:AT1G29930%09red/ath:AT1G15820%09red/ath:AT3G54890%09red/ath:AT2G05100%09red/ath:AT3G61470%09red/ath:AT5G01530%09red/ath:AT1G61520%09red/ath:AT3G47470%09red/ath:AT1G45474%09red
Alanine, aspartate and glutamate metabolism	KEGG PATHWAY	ath00250	27	51	0.00168679	0.00935016	BVRB_001510|BVRB_8g188810|BVRB_9g209080|BVRB_4g076880|BVRB_4g073470|BVRB_5g115070|BVRB_1g020030|BVRB_3g061240|BVRB_1g023250|BVRB_1g015650|BVRB_7g157660|BVRB_3g052140|BVRB_8g196670|BVRB_4g074870|BVRB_6g131750|BVRB_3g056180|BVRB_2g028910|BVRB_9g203200|BVRB_4g088660|BVRB_7g159090|BVRB_7g169130|BVRB_6g148110|BVRB_2g047840|BVRB_5g113530|BVRB_6g131780|BVRB_9g214920|BVRB_2g031080	http://www.genome.jp/kegg-bin/show_pathway?ath00250/ath:AT5G11520%09red/ath:AT1G29900%09red/ath:AT5G17330%09red/ath:AT3G20330%09red/ath:AT5G14760%09red/ath:AT1G65960%09red/ath:AT3G27740%09red/ath:AT5G62530%09red/ath:AT3G57610%09red/ath:AT5G18170%09red/ath:AT5G53460%09red/ath:AT3G16150%09red/ath:AT1G70580%09red/ath:AT3G24090%09red/ath:AT3G08860%09red/ath:AT2G30970%09red/ath:AT5G08100%09red/ath:AT2…
Oxidative phosphorylation	KEGG PATHWAY	ath00190	63	160	0.00169334	0.00935016	BVRB_021470|BVRB_5g105670|BVRB_5g108370|BVRB_7g180240|BVRB_1g004960|BVRB_4g074860|BVRB_7g156610|BVRB_6g131700|BVRB_1g019360|BVRB_018040|BVRB_6g150240|BVRB_011660|BVRB_2g047050|BVRB_9g217480|BVRB_5g120240|BVRB_4g074640|BVRB_017690|BVRB_7g159500|BVRB_9g223310|BVRB_9g211910|BVRB_032280|BVRB_7g168900|BVRB_1g014940|BVRB_6g128670|BVRB_2g033500|BVRB_6g129080|BVRB_4g094910|BVRB_9g216410|BVRB_4g092050|BVR…	http://www.genome.jp/kegg-bin/show_pathway?ath00190/ath:ArthCp028%09red/ath:AT4G34700%09red/ath:AT5G66760%09red/ath:AT4G39080%09red/ath:AT2G44520%09red/ath:AT1G17260%09red/ath:ArthCp010%09red/ath:ArthCp078%09red/ath:AT4G02620%09red/ath:AT5G40650%09red/ath:AT5G11770%09red/ath:AT3G08610%09red/ath:ArthCp071%09red/ath:AT4G26210%09red/ath:ArthCp074%09red/ath:AT2G28520%09red/ath:AT5G62670%09red/ath:AT2…
Arginine and proline metabolism	KEGG PATHWAY	ath00330	28	54	0.0017679	0.00935514	BVRB_5g126660|BVRB_3g068340|BVRB_1g007480|BVRB_007050|BVRB_008730|BVRB_2g040760|BVRB_9g209080|BVRB_9g216250|BVRB_6g140590|BVRB_8g191830|BVRB_5g115070|BVRB_2g025540|BVRB_7g169880|BVRB_9g222420|BVRB_3g067750|BVRB_5g116750|BVRB_4g081640|BVRB_8g196670|BVRB_2g047840|BVRB_3g055160|BVRB_7g175990|BVRB_5g113750|BVRB_4g082130|BVRB_8g188060|BVRB_6g149100|BVRB_8g187460|BVRB_3g052300|BVRB_2g031080	http://www.genome.jp/kegg-bin/show_pathway?ath00330/ath:AT5G11520%09red/ath:AT4G34880%09red/ath:AT3G55610%09red/ath:AT2G27450%09red/ath:AT4G25600%09red/ath:AT5G62530%09red/ath:AT2G14260%09red/ath:AT1G20270%09red/ath:AT4G34710%09red/ath:AT1G70310%09red/ath:AT2G43080%09red/ath:AT3G47450%09red/ath:AT4G29720%09red/ath:AT5G18900%09red/ath:AT5G46180%09red/ath:AT3G48000%09red/ath:AT1G44170%09red/ath:AT5…
beta-Alanine metabolism	KEGG PATHWAY	ath00410	26	50	0.0024559	0.0123007	BVRB_5g118010|BVRB_8g187780|BVRB_1g007480|BVRB_5g098290|BVRB_8g188810|BVRB_007050|BVRB_7g169880|BVRB_5g108020|BVRB_8g195840|BVRB_7g167060|BVRB_2g045950|BVRB_1g023250|BVRB_4g073850|BVRB_6g148180|BVRB_5g116750|BVRB_005510|BVRB_5g098280|BVRB_6g131750|BVRB_5g102830|BVRB_9g221490|BVRB_6g149100|BVRB_6g131780|BVRB_1g018350|BVRB_3g052300|BVRB_8g185570|BVRB_9g214920	http://www.genome.jp/kegg-bin/show_pathway?ath00410/ath:AT5G53120%09red/ath:AT2G02010%09red/ath:AT5G12200%09red/ath:AT4G04320%09red/ath:AT1G70310%09red/ath:AT1G65960%09red/ath:AT3G17810%09red/ath:AT1G54100%09red/ath:AT4G12290%09red/ath:AT5G17330%09red/ath:AT4G13360%09red/ath:AT3G51840%09red/ath:AT4G29720%09red/ath:AT5G64370%09red/ath:AT2G42490%09red/ath:AT4G20930%09red/ath:AT3G60510%09red/ath:AT4…
Plant hormone signal transduction	KEGG PATHWAY	ath04075	96	273	0.00251825	0.0123007	BVRB_9g223480|BVRB_4g083210|BVRB_8g180910|BVRB_3g062440|BVRB_8g193560|BVRB_9g224450|BVRB_9g224630|BVRB_6g149890|BVRB_3g052410|BVRB_012830|BVRB_3g068200|BVRB_2g031200|BVRB_7g169710|BVRB_4g079320|BVRB_8g197040|BVRB_4g083230|BVRB_1g021380|BVRB_1g022070|BVRB_5g111820|BVRB_7g165880|BVRB_9g223460|BVRB_9g224440|BVRB_5g120300|BVRB_4g092550|BVRB_8g195410|BVRB_7g166630|BVRB_8g197440|BVRB_5g121060|BVRB_7g17…	http://www.genome.jp/kegg-bin/show_pathway?ath04075/ath:AT4G33720%09red/ath:AT2G14960%09red/ath:AT4G17870%09red/ath:AT1G32640%09red/ath:AT2G41370%09red/ath:AT5G54510%09red/ath:AT5G53160%09red/ath:AT2G46690%09red/ath:AT2G21210%09red/ath:AT5G66880%09red/ath:AT5G42750%09red/ath:AT1G01360%09red/ath:AT5G39340%09red/ath:AT4G34760%09red/ath:AT3G29350%09red/ath:AT4G38840%09red/ath:AT3G62980%09red/ath:AT1…
Butanoate metabolism	KEGG PATHWAY	ath00650	14	19	0.0026385	0.0124107	BVRB_3g063160|BVRB_4g090610|BVRB_8g186060|BVRB_4g073980|BVRB_8g188810|BVRB_5g119210|BVRB_5g101200|BVRB_6g131780|BVRB_1g023250|BVRB_9g206140|BVRB_3g059040|BVRB_6g131750|BVRB_3g064410|BVRB_9g214920	http://www.genome.jp/kegg-bin/show_pathway?ath00650/ath:AT2G02010%09red/ath:AT2G26800%09red/ath:AT1G65960%09red/ath:AT3G56840%09red/ath:AT5G17330%09red/ath:AT2G31810%09red/ath:AT5G48230%09red/ath:AT4G11820%09red/ath:AT5G47720%09red/ath:AT3G25530%09red
Ribosome biogenesis in eukaryotes	KEGG PATHWAY	ath03008	43	101	0.00281471	0.0127667	BVRB_4g093530|BVRB_2g028220|BVRB_7g179240|BVRB_7g171630|BVRB_3g063610|BVRB_9g203840|BVRB_6g144150|BVRB_4g079190|BVRB_6g141200|BVRB_6g129640|BVRB_2g041090|BVRB_3g050570|BVRB_6g143360|BVRB_9g214620|BVRB_7g171440|BVRB_7g159190|BVRB_7g174020|BVRB_5g110490|BVRB_4g072830|BVRB_9g220070|BVRB_2g043120|BVRB_6g128810|BVRB_7g174800|BVRB_1g017430|BVRB_7g171230|BVRB_005730|BVRB_6g155000|BVRB_6g129860|BVRB_6g13…	http://www.genome.jp/kegg-bin/show_pathway?ath03008/ath:AT5G52470%09red/ath:AT2G44680%09red/ath:AT3G03920%09red/ath:AT1G15420%09red/ath:AT1G08410%09red/ath:AT3G21540%09red/ath:AT4G22380%09red/ath:AT5G66540%09red/ath:AT3G05060%09red/ath:AT3G57150%09red/ath:AT2G24990%09red/ath:AT1G63810%09red/ath:AT3G06530%09red/ath:AT3G12860%09red/ath:AT5G20020%09red/ath:AT1G15440%09red/ath:AT5G22100%09red/ath:AT1…
Plant-pathogen interaction	KEGG PATHWAY	ath04626	64	170	0.00362402	0.0158707	BVRB_1g004190|BVRB_4g091210|BVRB_4g090710|BVRB_5g099870|BVRB_9g205300|BVRB_9g207760|BVRB_7g165250|BVRB_7g157730|BVRB_8g186280|BVRB_1g003240|BVRB_7g175500|BVRB_8g193560|BVRB_1g019350|BVRB_5g102070|BVRB_1g003220|BVRB_2g044780|BVRB_1g021990|BVRB_9g222560|BVRB_3g053350|BVRB_3g067530|BVRB_6g140130|BVRB_4g077510|BVRB_3g065090|BVRB_9g225070|BVRB_4g090940|BVRB_5g127070|BVRB_3g056940|BVRB_9g214950|BVRB_9g…	http://www.genome.jp/kegg-bin/show_pathway?ath04626/ath:AT5G47910%09red/ath:AT4G33720%09red/ath:AT5G19450%09red/ath:AT2G28260%09red/ath:AT3G48090%09red/ath:AT3G21220%09red/ath:AT3G25600%09red/ath:AT3G21630%09red/ath:AT3G03000%09red/ath:AT2G38470%09red/ath:AT4G04720%09red/ath:AT1G12310%09red/ath:AT5G46330%09red/ath:AT2G04880%09red/ath:AT5G53130%09red/ath:AT4G20780%09red/ath:AT5G66210%09red/ath:AT1…
Purine metabolism	KEGG PATHWAY	ath00230	42	100	0.00378208	0.0160108	BVRB_5g102910|BVRB_3g061370|BVRB_8g196140|BVRB_7g173220|XLOC_050792|BVRB_014900|BVRB_5g106550|BVRB_5g097810|BVRB_2g032480|BVRB_3g056480|BVRB_3g052850|BVRB_8g192630|BVRB_3g070380|BVRB_8g196130|BVRB_5g110510|BVRB_4g072500|BVRB_009820|BVRB_8g189610|BVRB_6g144320|BVRB_3g061240|BVRB_7g163200|BVRB_8g183390|BVRB_5g115510|BVRB_3g066000|BVRB_2g030580|BVRB_5g111690|BVRB_4g097600|BVRB_3g056630|BVRB_9g214540…	http://www.genome.jp/kegg-bin/show_pathway?ath00230/ath:AT1G09830%09red/ath:AT1G23190%09red/ath:AT4G04955%09red/ath:AT5G63400%09red/ath:AT5G47840%09red/ath:AT2G21790%09red/ath:AT3G23580%09red/ath:AT1G19920%09red/ath:AT3G22890%09red/ath:AT3G57610%09red/ath:AT1G54130%09red/ath:AT5G51820%09red/ath:AT3G57550%09red/ath:AT5G35170%09red/ath:AT4G22570%09red/ath:AT1G74260%09red/ath:AT3G55010%09red/ath:AT1…
Biosynthesis of amino acids	KEGG PATHWAY	ath01230	88	251	0.00393034	0.0161017	BVRB_5g114350|BVRB_006310|BVRB_7g172900|BVRB_5g106550|BVRB_3g059040|BVRB_7g161000|BVRB_6g152820|BVRB_5g117310|BVRB_005450|BVRB_8g189000|BVRB_3g052140|BVRB_8g196670|BVRB_1g004430|BVRB_1g015750|BVRB_5g120250|BVRB_6g148110|BVRB_9g218920|BVRB_8g200230|BVRB_6g130780|BVRB_2g026140|BVRB_5g109920|BVRB_8g194390|BVRB_7g165390|BVRB_2g038140|BVRB_2g024780|BVRB_2g037990|BVRB_9g209080|BVRB_7g169130|BVRB_4g0910…	http://www.genome.jp/kegg-bin/show_pathway?ath01230/ath:AT5G65770%09red/ath:AT2G29690%09red/ath:AT5G36160%09red/ath:AT2G43090%09red/ath:AT1G10070%09red/ath:AT2G21940%09red/ath:AT1G12230%09red/ath:AT3G17390%09red/ath:AT4G26270%09red/ath:AT3G55610%09red/ath:AT5G26780%09red/ath:AT3G01120%09red/ath:AT3G60880%09red/ath:AT1G75330%09red/ath:AT4G37670%09red/ath:AT2G22480%09red/ath:AT5G53460%09red/ath:AT5…
Starch and sucrose metabolism	KEGG PATHWAY	ath00500	62	165	0.00427637	0.0169718	BVRB_9g203760|BVRB_7g176950|BVRB_1g003280|BVRB_4g096640|BVRB_7g163460|BVRB_006250|BVRB_3g053140|BVRB_1g007110|BVRB_2g045340|BVRB_4g073320|BVRB_4g084880|BVRB_3g063010|BVRB_8g189070|BVRB_2g046340|BVRB_4g071150|BVRB_5g124290|BVRB_2g039230|BVRB_9g224680|BVRB_9g213370|BVRB_5g124880|BVRB_1g009450|BVRB_6g144320|BVRB_8g200320|BVRB_6g149170|BVRB_9g216520|BVRB_3g067590|BVRB_5g103540|BVRB_5g110070|BVRB_3g05…	http://www.genome.jp/kegg-bin/show_pathway?ath00500/ath:AT1G35910%09red/ath:AT1G23190%09red/ath:AT1G69830%09red/ath:AT3G43860%09red/ath:AT5G51460%09red/ath:AT1G11720%09red/ath:AT3G47010%09red/ath:AT4G24620%09red/ath:AT4G02280%09red/ath:AT5G03650%09red/ath:AT1G66250%09red/ath:AT1G60140%09red/ath:AT4G29130%09red/ath:AT5G54570%09red/ath:AT1G50460%09red/ath:AT1G76130%09red/ath:AT3G47050%09red/ath:AT3…
Pyruvate metabolism	KEGG PATHWAY	ath00620	37	86	0.00463832	0.0178505	BVRB_4g090610|BVRB_7g156800|BVRB_2g038590|BVRB_1g007480|BVRB_1g013550|BVRB_6g152330|BVRB_3g057770|BVRB_9g206140|BVRB_1g010250|BVRB_1g012740|BVRB_3g053760|BVRB_1g017150|BVRB_5g122810|BVRB_3g052850|BVRB_2g038890|BVRB_7g169880|BVRB_6g133460|BVRB_3g049020|BVRB_5g110660|BVRB_4g095480|BVRB_002340|BVRB_5g116750|BVRB_4g084590|XLOC_039551|BVRB_8g186030|BVRB_5g120180|BVRB_5g109260|BVRB_9g209750|BVRB_3g0588…	http://www.genome.jp/kegg-bin/show_pathway?ath00620/ath:AT1G06130%09red/ath:AT5G50850%09red/ath:AT2G22780%09red/ath:AT5G35360%09red/ath:AT3G47520%09red/ath:AT5G47720%09red/ath:AT3G10850%09red/ath:AT1G04410%09red/ath:AT5G50950%09red/ath:AT1G79750%09red/ath:AT5G48230%09red/ath:AT5G03860%09red/ath:AT1G11840%09red/ath:AT1G36160%09red/ath:AT2G13560%09red/ath:AT4G15530%09red/ath:AT3G16910%09red/ath:AT4…
RNA polymerase	KEGG PATHWAY	ath03020	23	45	0.00496866	0.0185594	BVRB_1g001740|BVRB_018950|BVRB_018880|BVRB_5g098390|BVRB_1g007130|BVRB_7g170280|BVRB_3g055310|BVRB_1g022970|BVRB_002940|BVRB_9g209800|BVRB_6g135800|BVRB_1g020650|BVRB_6g152650|BVRB_013160|BVRB_005160|BVRB_1g007210|BVRB_3g053850|BVRB_014870|BVRB_019490|BVRB_9g212450|BVRB_4g090870|BVRB_3g055960|BVRB_7g172960	http://www.genome.jp/kegg-bin/show_pathway?ath03020/ath:AT1G06790%09red/ath:AT3G49000%09red/ath:AT5G45140%09red/ath:AT2G15400%09red/ath:AT3G13940%09red/ath:AT2G29540%09red/ath:AT3G16980%09red/ath:AT5G60040%09red/ath:ArthCp013%09red/ath:ArthCp012%09red/ath:AT3G22320%09red/ath:ArthCp014%09red/ath:ArthCp055%09red/ath:AT1G60620%09red/ath:AT3G57660%09red/ath:AT4G35800%09red/ath:AT3G25940%09red
Isoquinoline alkaloid biosynthesis	KEGG PATHWAY	ath00950	14	22	0.00672563	0.0244044	BVRB_8g198760|BVRB_5g118010|BVRB_005510|BVRB_7g166040|BVRB_9g225780|BVRB_5g108020|BVRB_5g098280|BVRB_8g196670|BVRB_2g047840|BVRB_5g098290|BVRB_9g209080|BVRB_8g198750|BVRB_6g148180|BVRB_2g031080	http://www.genome.jp/kegg-bin/show_pathway?ath00950/ath:AT5G36160%09red/ath:AT5G11520%09red/ath:AT4G12290%09red/ath:AT2G42490%09red/ath:AT4G31990%09red/ath:AT2G20340%09red/ath:AT2G30970%09red/ath:AT4G14940%09red/ath:AT5G19550%09red
Circadian rhythm - plant	KEGG PATHWAY	ath04712	19	36	0.00789402	0.0278484	BVRB_9g210980|BVRB_1g018740|BVRB_1g003520|BVRB_6g154770|BVRB_1g018750|BVRB_1g018770|BVRB_1g017430|BVRB_8g198410|BVRB_9g204280|BVRB_005310|BVRB_6g132500|BVRB_5g114270|BVRB_6g153730|BVRB_1g001980|BVRB_1g002120|BVRB_4g079320|BVRB_2g042860|BVRB_3g051050|BVRB_7g162100	http://www.genome.jp/kegg-bin/show_pathway?ath04712/ath:AT5G24470%09red/ath:AT5G61380%09red/ath:AT5G02810%09red/ath:AT5G11260%09red/ath:AT5G57360%09red/ath:AT2G44680%09red/ath:AT5G08330%09red/ath:AT5G62430%09red/ath:AT2G46790%09red/ath:AT1G68050%09red/ath:AT2G32950%09red/ath:AT1G09570%09red/ath:AT1G09530%09red/ath:AT5G13930%09red/ath:AT2G46340%09red/ath:AT1G01060%09red
RNA degradation	KEGG PATHWAY	ath03018	44	113	0.0089145	0.0294294	BVRB_5g108500|BVRB_5g118810|BVRB_2g042780|BVRB_5g106690|BVRB_2g044090|BVRB_5g110100|BVRB_3g055040|BVRB_7g172900|BVRB_2g039560|BVRB_6g143010|BVRB_5g111060|BVRB_9g221870|BVRB_4g090530|BVRB_5g109790|BVRB_1g011490|BVRB_7g160370|BVRB_7g163220|BVRB_3g052400|BVRB_014000|BVRB_4g092730|BVRB_6g132040|BVRB_1g003610|BVRB_7g164860|BVRB_005380|BVRB_9g223140|XLOC_000537|BVRB_8g197870|BVRB_5g108570|BVRB_8g201230…	http://www.genome.jp/kegg-bin/show_pathway?ath03018/ath:AT5G09590%09red/ath:AT3G25430%09red/ath:AT5G35910%09red/ath:AT3G46960%09red/ath:AT4G26270%09red/ath:AT3G13860%09red/ath:AT3G46210%09red/ath:AT1G55490%09red/ath:AT2G22480%09red/ath:AT5G48870%09red/ath:AT2G06990%09red/ath:AT5G59710%09red/ath:AT2G36530%09red/ath:AT1G03905%09red/ath:AT2G29560%09red/ath:AT3G61620%09red/ath:AT4G29830%09red/ath:AT3…
Valine, leucine and isoleucine degradation	KEGG PATHWAY	ath00280	24	51	0.00900837	0.0294294	BVRB_4g090610|BVRB_8g186060|BVRB_8g187780|BVRB_1g007480|BVRB_6g137390|BVRB_9g206140|BVRB_4g076880|BVRB_9g208200|BVRB_1g010630|BVRB_7g169880|BVRB_8g195840|BVRB_4g073980|BVRB_7g157660|BVRB_3g063160|BVRB_1g014510|BVRB_5g116750|BVRB_2g038030|BVRB_6g137380|BVRB_5g119740|BVRB_5g104920|BVRB_7g178220|BVRB_3g067170|BVRB_5g101200|BVRB_1g018350	http://www.genome.jp/kegg-bin/show_pathway?ath00280/ath:AT5G65770%09red/ath:AT3G06850%09red/ath:AT1G10070%09red/ath:AT5G47720%09red/ath:AT4G16800%09red/ath:AT4G11820%09red/ath:AT4G13360%09red/ath:AT2G33150%09red/ath:AT1G03090%09red/ath:AT1G21400%09red/ath:AT5G48230%09red/ath:AT3G60510%09red/ath:AT2G26800%09red/ath:AT3G08860%09red/ath:AT3G16170%09red/ath:AT4G20930%09red/ath:AT3G45300%09red/ath:AT3…
Galactose metabolism	KEGG PATHWAY	ath00052	26	57	0.00912412	0.0294294	BVRB_2g042760|BVRB_006250|BVRB_3g053140|BVRB_8g199380|BVRB_4g079980|BVRB_006460|BVRB_3g063010|BVRB_7g177120|BVRB_9g224680|BVRB_5g122070|BVRB_5g098710|BVRB_4g096640|BVRB_6g144320|BVRB_5g122490|BVRB_3g053110|BVRB_2g034670|BVRB_4g080000|BVRB_3g066000|BVRB_5g124820|BVRB_8g197870|BVRB_2g046600|BVRB_7g170580|BVRB_4g073320|BVRB_8g193750|BVRB_6g138960|BVRB_2g047220	http://www.genome.jp/kegg-bin/show_pathway?ath00052/ath:AT1G50460%09red/ath:AT3G47800%09red/ath:AT5G11720%09red/ath:AT5G08380%09red/ath:AT1G23190%09red/ath:AT5G17310%09red/ath:AT5G51820%09red/ath:AT2G47180%09red/ath:AT4G26270%09red/ath:AT1G56600%09red/ath:AT4G10960%09red/ath:AT3G13790%09red/ath:AT1G47840%09red/ath:AT3G45940%09red/ath:AT5G20250%09red/ath:AT3G56310%09red/ath:AT4G29130%09red/ath:AT2…
Phenylpropanoid biosynthesis	KEGG PATHWAY	ath00940	60	166	0.00926909	0.0294294	BVRB_6g140400|BVRB_1g002050|BVRB_8g189070|BVRB_7g162180|BVRB_5g107340|BVRB_2g029880|BVRB_3g050950|BVRB_6g129010|BVRB_005400|BVRB_018260|BVRB_1g012070|BVRB_4g074620|BVRB_005260|BVRB_9g208170|BVRB_9g205500|BVRB_9g216140|BVRB_7g175860|BVRB_3g050880|BVRB_3g066090|XLOC_019875|BVRB_9g219800|BVRB_9g205510|BVRB_1g002000|BVRB_004760|BVRB_8g200320|BVRB_9g209040|BVRB_6g131440|BVRB_6g150930|BVRB_6g129470|BVR…	http://www.genome.jp/kegg-bin/show_pathway?ath00940/ath:AT5G54160%09red/ath:AT5G48930%09red/ath:AT5G51890%09red/ath:AT3G47010%09red/ath:AT4G39330%09red/ath:AT4G34050%09red/ath:AT5G66390%09red/ath:AT1G72680%09red/ath:AT1G67980%09red/ath:AT4G05160%09red/ath:AT3G47050%09red/ath:AT5G54570%09red/ath:AT3G19450%09red/ath:AT1G05260%09red/ath:AT3G24503%09red/ath:AT4G33870%09red/ath:AT5G42180%09red/ath:AT5…
Base excision repair	KEGG PATHWAY	ath03410	21	43	0.0103375	0.0315079	BVRB_7g176050|BVRB_5g120830|BVRB_9g223050|BVRB_005250|BVRB_6g130610|BVRB_3g056910|BVRB_9g220520|BVRB_7g163730|BVRB_9g219360|BVRB_3g060210|BVRB_3g062210|BVRB_9g211000|BVRB_4g078990|BVRB_8g181170|BVRB_6g132480|BVRB_6g140040|BVRB_5g119190|BVRB_2g038390|BVRB_011910|BVRB_5g116310|BVRB_6g156420	http://www.genome.jp/kegg-bin/show_pathway?ath03410/ath:AT1G13635%09red/ath:AT3G07930%09red/ath:AT1G52500%09red/ath:AT3G12710%09red/ath:AT2G29570%09red/ath:AT2G31450%09red/ath:AT1G80420%09red/ath:AT2G27470%09red/ath:AT5G26680%09red/ath:AT2G42120%09red/ath:AT3G47830%09red/ath:AT4G02390%09red/ath:AT4G12740%09red/ath:AT5G57970%09red/ath:AT4G36050%09red/ath:AT2G31320%09red/ath:AT5G13920%09red/ath:AT5…
Thiamine metabolism	KEGG PATHWAY	ath00730	13	21	0.0104199	0.0315079	BVRB_6g150990|BVRB_8g192630|BVRB_4g077380|BVRB_5g123450|BVRB_5g110510|BVRB_6g137070|BVRB_6g133960|XLOC_013497|BVRB_1g001680|BVRB_2g043260|BVRB_2g037030|BVRB_3g053910|BVRB_7g172570	http://www.genome.jp/kegg-bin/show_pathway?ath00730/ath:AT2G29630%09red/ath:AT1G67440%09red/ath:AT4G15560%09red/ath:AT5G54770%09red/ath:AT5G63400%09red/ath:AT5G47840%09red/ath:AT5G35170%09red/ath:AT3G16990%09red/ath:AT5G32470%09red/ath:AT1G02880%09red/ath:AT5G66005%09red/ath:AT1G22940%09red
Pentose phosphate pathway	KEGG PATHWAY	ath00030	26	58	0.0107634	0.0317896	BVRB_5g114350|BVRB_3g051150|BVRB_5g097920|BVRB_1g007880|BVRB_1g011460|BVRB_5g106550|BVRB_6g140350|BVRB_4g091040|BVRB_6g144320|BVRB_4g079860|BVRB_4g083630|BVRB_6g136300|BVRB_6g150380|BVRB_3g066000|BVRB_3g051140|BVRB_5g103840|BVRB_8g197870|BVRB_6g143310|BVRB_8g185430|BVRB_1g011600|BVRB_2g046600|BVRB_5g111310|BVRB_6g129880|BVRB_2g031320|BVRB_2g044900|BVRB_6g138960	http://www.genome.jp/kegg-bin/show_pathway?ath00030/ath:AT2G24270%09red/ath:AT5G13110%09red/ath:AT1G23190%09red/ath:AT1G12230%09red/ath:AT4G24620%09red/ath:AT4G26270%09red/ath:AT2G22480%09red/ath:AT5G61410%09red/ath:AT1G13700%09red/ath:AT5G51820%09red/ath:AT1G43670%09red/ath:AT5G24400%09red/ath:AT2G35390%09red/ath:AT4G26530%09red/ath:AT5G40760%09red/ath:AT3G04790%09red/ath:AT3G54050%09red/ath:AT4…
Phenylalanine metabolism	KEGG PATHWAY	ath00360	17	32	0.0110923	0.0320164	BVRB_8g198760|BVRB_5g118010|BVRB_4g081640|BVRB_005510|BVRB_7g166040|BVRB_9g225780|BVRB_5g108020|BVRB_5g098280|BVRB_8g196670|BVRB_7g161880|BVRB_5g098290|BVRB_9g209080|BVRB_4g082130|BVRB_8g198750|BVRB_2g047840|BVRB_6g148180|BVRB_2g031080	http://www.genome.jp/kegg-bin/show_pathway?ath00360/ath:AT5G36160%09red/ath:AT5G11520%09red/ath:AT4G12290%09red/ath:AT4G31990%09red/ath:AT2G37040%09red/ath:AT2G20340%09red/ath:AT4G34880%09red/ath:AT2G30970%09red/ath:AT1G08980%09red/ath:AT2G42490%09red/ath:AT4G14940%09red/ath:AT5G19550%09red
alpha-Linolenic acid metabolism	KEGG PATHWAY	ath00592	21	44	0.0124671	0.0351848	BVRB_8g196760|BVRB_001030|BVRB_3g062380|BVRB_7g178220|BVRB_3g064920|BVRB_001000|BVRB_8g198160|XLOC_031537|BVRB_5g102830|BVRB_1g010740|BVRB_1g007070|BVRB_9g218200|BVRB_1g022990|BVRB_7g169930|BVRB_4g072060|BVRB_6g151340|BVRB_7g178570|BVRB_7g171950|BVRB_1g012610|BVRB_4g074800|BVRB_6g133820	http://www.genome.jp/kegg-bin/show_pathway?ath00592/ath:AT4G29010%09red/ath:AT2G06050%09red/ath:AT1G20510%09red/ath:AT3G03310%09red/ath:AT1G67560%09red/ath:AT5G42650%09red/ath:AT4G13010%09red/ath:AT1G77120%09red/ath:AT3G51840%09red/ath:AT1G76690%09red/ath:AT2G06925%09red/ath:AT1G19640%09red/ath:AT2G33150%09red/ath:AT1G17420%09red/ath:AT5G04040%09red/ath:AT3G45140%09red
Inositol phosphate metabolism	KEGG PATHWAY	ath00562	32	78	0.013448	0.0371281	BVRB_4g084270|BVRB_4g097150|BVRB_1g000560|BVRB_1g000300|BVRB_2g044190|BVRB_2g024780|BVRB_9g217710|BVRB_7g177630|BVRB_9g217040|BVRB_7g172070|BVRB_2g044760|BVRB_9g224200|BVRB_8g197960|BVRB_4g089170|BVRB_5g102860|BVRB_8g184830|BVRB_1g016800|BVRB_7g172080|BVRB_6g135490|BVRB_6g127370|BVRB_1g007060|BVRB_7g172180|BVRB_3g059330|BVRB_7g173820|BVRB_3g049650|BVRB_7g169440|BVRB_6g148700|BVRB_2g023760|BVRB_3g…	http://www.genome.jp/kegg-bin/show_pathway?ath00562/ath:AT2G43980%09red/ath:AT1G09870%09red/ath:AT5G58730%09red/ath:AT5G64070%09red/ath:AT5G42810%09red/ath:AT1G60890%09red/ath:AT5G61760%09red/ath:AT1G68000%09red/ath:AT4G39120%09red/ath:AT3G10550%09red/ath:AT3G55440%09red/ath:AT3G09920%09red/ath:AT1G49340%09red/ath:AT1G21980%09red/ath:AT4G26260%09red/ath:AT3G02870%09red/ath:AT5G58700%09red/ath:AT1…
Terpenoid backbone biosynthesis	KEGG PATHWAY	ath00900	26	60	0.0147554	0.0398709	BVRB_4g090610|BVRB_8g186060|BVRB_1g004830|BVRB_9g206140|BVRB_5g114670|BVRB_3g056900|BVRB_5g126770|BVRB_5g121040|BVRB_1g012790|BVRB_9g217680|BVRB_7g178920|BVRB_5g125120|BVRB_5g107250|BVRB_6g137830|BVRB_6g153170|BVRB_7g172230|BVRB_9g208020|BVRB_2g045540|BVRB_2g043260|BVRB_8g184270|BVRB_1g004140|BVRB_5g101200|BVRB_6g133960|BVRB_9g215930|BVRB_2g026280|BVRB_4g090750	http://www.genome.jp/kegg-bin/show_pathway?ath00900/ath:AT4G15560%09red/ath:AT3G59380%09red/ath:AT1G74470%09red/ath:AT4G01320%09red/ath:AT4G11820%09red/ath:AT5G47720%09red/ath:AT1G11755%09red/ath:AT5G58770%09red/ath:AT2G17570%09red/ath:AT4G36810%09red/ath:AT5G60600%09red/ath:AT5G48230%09red/ath:AT4G33360%09red/ath:AT5G08335%09red/ath:AT1G76490%09red/ath:AT4G17190%09red/ath:AT2G34630%09red/ath:AT1…
Amino sugar and nucleotide sugar metabolism	KEGG PATHWAY	ath00520	48	131	0.0152573	0.0403682	BVRB_2g025490|BVRB_8g197730|BVRB_4g096640|BVRB_006250|BVRB_3g058210|BVRB_8g194860|BVRB_1g007110|BVRB_2g039130|BVRB_5g114250|BVRB_3g052810|BVRB_5g102110|BVRB_2g028910|BVRB_8g190010|BVRB_9g224680|BVRB_6g137090|BVRB_1g007720|BVRB_5g098710|BVRB_4g084870|BVRB_6g144320|BVRB_4g080950|BVRB_8g190250|BVRB_8g198230|BVRB_8g197740|BVRB_3g064070|BVRB_1g007880|BVRB_3g051020|BVRB_3g066000|BVRB_5g124820|BVRB_7g16…	http://www.genome.jp/kegg-bin/show_pathway?ath00520/ath:AT1G47840%09red/ath:AT1G23190%09red/ath:AT5G17310%09red/ath:AT2G45310%09red/ath:AT1G78570%09red/ath:AT1G05590%09red/ath:AT3G12500%09red/ath:AT4G29130%09red/ath:AT3G23820%09red/ath:AT1G50460%09red/ath:AT5G17770%09red/ath:AT1G66430%09red/ath:AT1G27680%09red/ath:AT2G20810%09red/ath:AT4G33030%09red/ath:AT5G51820%09red/ath:AT1G74910%09red/ath:AT5…
Phosphatidylinositol signaling system	KEGG PATHWAY	ath04070	30	76	0.0237465	0.0615471	BVRB_4g084270|BVRB_4g097150|BVRB_1g000560|BVRB_1g000300|BVRB_2g044190|BVRB_6g127370|BVRB_9g206710|BVRB_9g217710|BVRB_7g177630|BVRB_9g217040|BVRB_9g220180|BVRB_4g078480|BVRB_7g172070|BVRB_4g089130|BVRB_9g224200|BVRB_5g113810|BVRB_4g089170|BVRB_5g102860|BVRB_8g184830|BVRB_7g172080|BVRB_1g007060|BVRB_2g040500|BVRB_6g148700|BVRB_3g049650|BVRB_8g198900|BVRB_2g023760|BVRB_3g068150|BVRB_4g079070|BVRB_6g…	http://www.genome.jp/kegg-bin/show_pathway?ath04070/ath:AT5G64070%09red/ath:AT5G15070%09red/ath:AT5G42810%09red/ath:AT5G07920%09red/ath:AT1G60890%09red/ath:AT5G61760%09red/ath:AT4G30340%09red/ath:AT1G68000%09red/ath:AT4G39120%09red/ath:AT3G10550%09red/ath:AT5G63770%09red/ath:AT4G22340%09red/ath:AT3G09920%09red/ath:AT1G49340%09red/ath:AT1G21980%09red/ath:AT3G02870%09red/ath:AT5G58700%09red/ath:AT1…
N-Glycan biosynthesis	KEGG PATHWAY	ath00510	20	45	0.0248569	0.0631366	BVRB_008740|BVRB_9g203860|BVRB_2g027550|BVRB_4g097180|BVRB_2g023540|BVRB_2g024670|BVRB_4g085190|BVRB_9g205450|BVRB_011620|BVRB_7g178950|BVRB_2g026740|BVRB_6g143940|BVRB_3g062200|BVRB_3g063130|BVRB_6g151020|BVRB_5g109010|BVRB_4g085810|BVRB_4g078610|BVRB_1g017550|BVRB_7g179770	http://www.genome.jp/kegg-bin/show_pathway?ath00510/ath:AT5G38460%09red/ath:AT1G32210%09red/ath:AT4G16710%09red/ath:AT1G67490%09red/ath:AT1G20575%09red/ath:AT4G21150%09red/ath:AT5G02410%09red/ath:AT2G16530%09red/ath:AT1G16570%09red/ath:AT3G57220%09red/ath:AT5G03080%09red/ath:AT2G47760%09red/ath:AT1G16900%09red/ath:AT2G40190%09red/ath:AT3G45040%09red/ath:AT1G02145%09red/ath:AT2G39630%09red/ath:AT3…
Stilbenoid, diarylheptanoid and gingerol biosynthesis	KEGG PATHWAY	ath00945	6	7	0.0293751	0.072564	BVRB_2g030450|BVRB_6g147850|BVRB_004760|BVRB_9g216210|BVRB_7g175810|BVRB_6g150930	http://www.genome.jp/kegg-bin/show_pathway?ath00945/ath:AT2G30490%09red/ath:AT4G34050%09red/ath:AT5G48930%09red/ath:AT1G67980%09red/ath:AT4G26220%09red
Cysteine and methionine metabolism	KEGG PATHWAY	ath00270	43	121	0.0297112	0.072564	BVRB_1g014510|BVRB_9g225780|BVRB_6g137390|BVRB_9g209080|BVRB_4g076880|BVRB_5g122810|BVRB_4g079640|BVRB_8g191830|BVRB_3g050790|BVRB_3g049020|BVRB_5g099920|BVRB_003270|BVRB_8g185300|BVRB_7g157660|BVRB_5g122980|BVRB_8g189000|BVRB_004720|BVRB_9g223720|BVRB_6g137210|BVRB_9g204220|BVRB_6g140590|BVRB_8g196670|BVRB_4g090050|BVRB_3g065500|BVRB_6g137380|BVRB_2g047840|BVRB_6g130780|BVRB_1g004430|BVRB_9g2203…	http://www.genome.jp/kegg-bin/show_pathway?ath00270/ath:AT5G65770%09red/ath:AT3G61440%09red/ath:AT5G36160%09red/ath:AT5G11520%09red/ath:AT1G10070%09red/ath:AT5G53850%09red/ath:AT4G13940%09red/ath:AT3G17390%09red/ath:AT3G47520%09red/ath:AT3G01120%09red/ath:AT2G22780%09red/ath:AT1G05010%09red/ath:AT4G19710%09red/ath:AT2G17630%09red/ath:AT5G17920%09red/ath:AT1G04410%09red/ath:AT3G63250%09red/ath:AT5…
mRNA surveillance pathway	KEGG PATHWAY	ath03015	41	115	0.0319414	0.0764761	BVRB_8g189830|BVRB_7g179300|BVRB_6g130730|BVRB_4g089870|BVRB_9g221130|BVRB_001760|BVRB_2g033360|BVRB_4g090360|BVRB_6g141500|BVRB_1g005930|BVRB_9g211380|BVRB_7g173150|BVRB_5g115620|BVRB_4g081400|BVRB_6g155720|BVRB_8g187630|BVRB_3g048450|BVRB_8g199390|BVRB_010600|BVRB_7g174340|BVRB_8g184750|BVRB_003190|BVRB_3g056860|BVRB_9g204750|BVRB_4g075970|BVRB_4g073140|BVRB_1g015470|BVRB_2g045680|BVRB_4g090130…	http://www.genome.jp/kegg-bin/show_pathway?ath03015/ath:AT4G26650%09red/ath:AT5G10630%09red/ath:AT1G30460%09red/ath:AT5G59950%09red/ath:AT1G13320%09red/ath:AT3G07810%09red/ath:AT3G19760%09red/ath:AT3G26618%09red/ath:AT4G36960%09red/ath:AT5G14530%09red/ath:AT1G16610%09red/ath:AT3G52210%09red/ath:AT5G47880%09red/ath:AT1G61010%09red/ath:AT1G73820%09red/ath:AT5G59160%09red/ath:AT2G13540%09red/ath:AT4…
Ascorbate and aldarate metabolism	KEGG PATHWAY	ath00053	22	53	0.0328256	0.0764761	BVRB_7g159920|BVRB_4g097150|BVRB_6g130340|BVRB_5g099950|BVRB_1g007480|BVRB_8g197960|BVRB_6g133650|BVRB_9g217040|BVRB_7g179630|BVRB_6g130390|BVRB_7g169880|BVRB_2g030290|BVRB_2g032020|BVRB_5g116750|BVRB_8g184830|BVRB_1g002270|BVRB_6g130370|BVRB_9g207350|BVRB_4g088640|BVRB_6g130380|BVRB_1g007470|BVRB_016770	http://www.genome.jp/kegg-bin/show_pathway?ath00053/ath:AT1G77490%09red/ath:AT4G35970%09red/ath:AT4G35000%09red/ath:AT1G54100%09red/ath:AT2G46760%09red/ath:AT4G39120%09red/ath:AT3G52880%09red/ath:AT1G07890%09red/ath:AT5G11540%09red/ath:AT4G26850%09red/ath:AT4G26260%09red/ath:AT4G32320%09red/ath:AT3G02870%09red/ath:AT3G09640%09red/ath:AT3G48000%09red/ath:AT1G63940%09red/ath:AT1G44170%09red
Fatty acid metabolism	KEGG PATHWAY	ath01212	27	69	0.0331196	0.0764761	BVRB_4g090610|BVRB_7g156800|BVRB_5g102830|BVRB_6g152330|BVRB_9g206140|BVRB_003100|BVRB_7g175400|BVRB_5g104830|BVRB_5g098860|BVRB_1g012740|BVRB_7g176720|BVRB_3g065110|BVRB_9g204520|XLOC_066244|BVRB_2g038030|BVRB_4g071650|BVRB_1g003210|BVRB_5g104820|BVRB_8g196760|BVRB_4g074670|BVRB_8g190580|BVRB_7g178220|BVRB_5g104840|BVRB_9g218160|BVRB_9g214940|BVRB_4g081450|BVRB_9g207660	http://www.genome.jp/kegg-bin/show_pathway?ath01212/ath:AT4G29010%09red/ath:ArthCp031%09red/ath:AT1G49430%09red/ath:AT5G35360%09red/ath:AT5G46290%09red/ath:AT1G08510%09red/ath:AT5G47720%09red/ath:AT3G45770%09red/ath:AT5G48230%09red/ath:AT3G51840%09red/ath:AT5G47340%09red/ath:AT3G23790%09red/ath:AT3G60340%09red/ath:AT1G36160%09red/ath:AT5G27600%09red/ath:AT2G33150%09red/ath:AT4G23850%09red/ath:AT3…
Fructose and mannose metabolism	KEGG PATHWAY	ath00051	25	64	0.0397534	0.0901551	BVRB_2g025490|BVRB_2g024780|BVRB_8g185180|BVRB_1g011460|BVRB_009700|BVRB_9g204890|BVRB_4g091040|BVRB_9g224680|BVRB_6g129180|BVRB_8g198830|BVRB_8g188620|BVRB_7g156760|BVRB_5g124820|BVRB_7g173820|BVRB_8g197870|BVRB_3g066230|BVRB_2g027840|BVRB_8g185430|BVRB_2g026100|BVRB_2g046600|BVRB_4g073320|BVRB_5g111310|BVRB_6g129880|BVRB_1g002670|BVRB_6g138960	http://www.genome.jp/kegg-bin/show_pathway?ath00051/ath:AT1G50460%09red/ath:AT5G51970%09red/ath:AT1G66430%09red/ath:AT4G29130%09red/ath:AT5G01930%09red/ath:AT5G57655%09red/ath:AT4G26270%09red/ath:AT1G12000%09red/ath:AT3G17770%09red/ath:AT4G26530%09red/ath:AT1G43670%09red/ath:AT1G01220%09red/ath:AT5G66460%09red/ath:AT2G39770%09red/ath:AT2G20680%09red/ath:AT1G74910%09red/ath:AT1G47840%09red/ath:AT3…
Arginine biosynthesis	KEGG PATHWAY	ath00220	16	36	0.0418481	0.0932405	BVRB_001510|BVRB_1g006010|BVRB_5g106060|BVRB_7g169130|BVRB_9g218920|BVRB_9g218940|BVRB_6g148110|BVRB_8g196670|BVRB_3g067750|BVRB_3g056180|BVRB_9g209080|BVRB_3g056930|BVRB_2g047840|BVRB_3g069380|BVRB_6g128260|BVRB_2g031080	http://www.genome.jp/kegg-bin/show_pathway?ath00220/ath:AT4G37670%09red/ath:AT1G70580%09red/ath:AT5G11520%09red/ath:AT3G47450%09red/ath:AT1G75330%09red/ath:AT4G31990%09red/ath:AT3G57560%09red/ath:AT5G18170%09red/ath:AT2G30970%09red/ath:AT4G17830%09red/ath:AT1G72330%09red/ath:AT1G80600%09red/ath:AT2G19940%09red/ath:AT5G35630%09red/ath:AT5G19550%09red
Monoterpenoid biosynthesis	KEGG PATHWAY	ath00902	6	8	0.0429319	0.094006	BVRB_1g005820|BVRB_6g133980|BVRB_8g186630|BVRB_8g186610|BVRB_8g201900|BVRB_7g171750	http://www.genome.jp/kegg-bin/show_pathway?ath00902/ath:AT3G61220%09red/ath:AT1G61680%09red/ath:AT4G37990%09red
Nicotinate and nicotinamide metabolism	KEGG PATHWAY	ath00760	9	16	0.0455008	0.0979425	BVRB_7g159760|BVRB_009200|BVRB_3g070790|BVRB_8g194870|BVRB_7g174130|BVRB_7g170500|BVRB_5g102470|BVRB_9g203200|BVRB_4g084970	http://www.genome.jp/kegg-bin/show_pathway?ath00760/ath:AT5G50210%09red/ath:AT3G62040%09red/ath:AT2G01350%09red/ath:AT2G36310%09red/ath:AT4G14930%09red/ath:AT5G14760%09red/ath:AT1G72880%09red/ath:AT5G20070%09red/ath:AT1G78590%09red
Fatty acid biosynthesis	KEGG PATHWAY	ath00061	18	43	0.0475455	0.100638	BVRB_2g038030|BVRB_7g156800|BVRB_4g074670|BVRB_8g190580|BVRB_9g204520|BVRB_9g214940|BVRB_7g179730|BVRB_9g218160|BVRB_6g152330|BVRB_003100|BVRB_4g081450|BVRB_7g175400|BVRB_9g207660|BVRB_1g012740|BVRB_3g065110|BVRB_5g098860|BVRB_1g003210|BVRB_7g176720	http://www.genome.jp/kegg-bin/show_pathway?ath00061/ath:AT4G13050%09red/ath:AT5G27600%09red/ath:AT2G04540%09red/ath:AT4G23850%09red/ath:AT1G36160%09red/ath:AT3G45770%09red/ath:AT5G10160%09red/ath:AT3G02630%09red/ath:AT5G35360%09red/ath:AT5G46290%09red/ath:AT1G08510%09red/ath:ArthCp031%09red/ath:AT2G38040%09red/ath:AT3G23790%09red/ath:AT3G16170%09red/ath:AT1G49430%09red/ath:AT1G74960%09red
DNA replication	KEGG PATHWAY	ath03030	20	50	0.0521621	0.1086	BVRB_7g176050|BVRB_2g040150|BVRB_012480|BVRB_8g188560|BVRB_005250|BVRB_6g150500|BVRB_6g132480|BVRB_1g007540|BVRB_5g123610|BVRB_008590|BVRB_3g060210|BVRB_5g126970|BVRB_6g139950|BVRB_7g168420|BVRB_4g078990|BVRB_5g125990|BVRB_003110|BVRB_6g150470|BVRB_6g151510|BVRB_8g192560	http://www.genome.jp/kegg-bin/show_pathway?ath03030/ath:AT5G22010%09red/ath:AT2G29570%09red/ath:AT2G25100%09red/ath:AT5G08020%09red/ath:AT1G21690%09red/ath:AT5G67100%09red/ath:AT1G67630%09red/ath:AT1G77470%09red/ath:AT2G27470%09red/ath:AT5G63960%09red/ath:AT2G42120%09red/ath:AT3G18580%09red/ath:AT2G07690%09red/ath:AT1G44900%09red/ath:AT5G46280%09red/ath:AT1G67320%09red/ath:AT5G26680%09red/ath:AT5…
Tryptophan metabolism	KEGG PATHWAY	ath00380	23	60	0.0541045	0.109211	BVRB_4g090610|BVRB_2g023870|BVRB_7g166040|BVRB_7g165940|BVRB_9g206140|BVRB_1g005140|BVRB_1g005160|BVRB_1g005100|BVRB_4g082130|BVRB_7g169880|BVRB_1g007480|BVRB_1g005120|BVRB_9g220350|BVRB_5g116750|BVRB_4g081640|BVRB_8g198760|BVRB_1g010030|BVRB_8g198750|BVRB_5g105330|BVRB_1g005110|BVRB_1g005130|BVRB_8g196270|BVRB_5g116340	http://www.genome.jp/kegg-bin/show_pathway?ath00380/ath:AT1G74100%09red/ath:AT1G54100%09red/ath:AT1G48910%09red/ath:AT4G31500%09red/ath:AT5G48230%09red/ath:AT2G20340%09red/ath:AT4G34880%09red/ath:AT1G24100%09red/ath:AT1G80360%09red/ath:AT1G08980%09red/ath:AT5G47720%09red/ath:AT4G13260%09red/ath:AT3G48000%09red/ath:AT1G44170%09red
Pyrimidine metabolism	KEGG PATHWAY	ath00240	22	57	0.0558821	0.109211	BVRB_7g159760|BVRB_2g026930|BVRB_2g031520|XLOC_064225|BVRB_5g121470|BVRB_8g184730|BVRB_3g055900|BVRB_1g020030|BVRB_2g045950|BVRB_7g179560|BVRB_4g087430|BVRB_4g071080|BVRB_6g133350|BVRB_4g073850|BVRB_5g119220|BVRB_4g074870|BVRB_7g170500|BVRB_4g088660|BVRB_7g159090|BVRB_3g070790|BVRB_9g221490|BVRB_9g212240	http://www.genome.jp/kegg-bin/show_pathway?ath00240/ath:AT3G27740%09red/ath:AT5G12200%09red/ath:AT5G23300%09red/ath:AT1G30820%09red/ath:AT3G17810%09red/ath:AT4G25280%09red/ath:AT2G36310%09red/ath:AT1G29900%09red/ath:AT4G22930%09red/ath:AT4G02120%09red/ath:AT5G26667%09red/ath:AT3G20330%09red/ath:AT4G14930%09red/ath:AT2G21790%09red/ath:AT3G18680%09red/ath:AT1G72880%09red/ath:AT3G23580%09red/ath:AT5…
Protein export	KEGG PATHWAY	ath03060	21	54	0.0576827	0.109211	BVRB_2g031270|BVRB_8g192340|BVRB_4g093960|BVRB_8g195620|BVRB_9g219700|BVRB_5g101520|BVRB_8g196570|BVRB_1g010050|BVRB_6g143080|BVRB_3g051570|BVRB_1g005730|BVRB_8g181270|BVRB_1g018440|BVRB_4g075680|BVRB_004510|BVRB_1g016550|BVRB_4g092910|BVRB_3g070160|BVRB_6g132280|BVRB_8g195590|BVRB_4g092900	http://www.genome.jp/kegg-bin/show_pathway?ath03060/ath:AT3G08980%09red/ath:AT3G24590%09red/ath:AT1G23465%09red/ath:AT3G60540%09red/ath:AT4G30600%09red/ath:AT1G48900%09red/ath:AT1G21650%09red/ath:AT1G52600%09red/ath:AT5G42020%09red/ath:AT2G34250%09red/ath:AT1G48160%09red/ath:AT2G45770%09red/ath:AT2G39960%09red/ath:AT2G18710%09red/ath:AT2G01110%09red
Tropane, piperidine and pyridine alkaloid biosynthesis	KEGG PATHWAY	ath00960	15	35	0.0585445	0.109211	BVRB_5g118010|BVRB_005510|BVRB_4g088210|BVRB_6g148180|BVRB_9g225780|BVRB_5g108020|BVRB_5g098280|BVRB_8g196670|BVRB_4g088200|BVRB_2g047840|BVRB_5g098290|BVRB_9g209080|BVRB_2g031080|BVRB_2g025400|XLOC_045411	http://www.genome.jp/kegg-bin/show_pathway?ath00960/ath:AT5G36160%09red/ath:AT5G11520%09red/ath:AT4G12290%09red/ath:AT2G42490%09red/ath:AT5G06060%09red/ath:AT4G31990%09red/ath:AT2G29260%09red/ath:AT2G30970%09red/ath:AT4G14940%09red/ath:AT5G19550%09red
Fatty acid elongation	KEGG PATHWAY	ath00062	15	35	0.0585445	0.109211	BVRB_2g036990|BVRB_9g217390|BVRB_1g002310|BVRB_6g146840|BVRB_1g012280|XLOC_066244|BVRB_7g157710|BVRB_5g104840|BVRB_6g146770|BVRB_6g146850|BVRB_1g004750|BVRB_7g175400|BVRB_5g104830|BVRB_2g044780|BVRB_5g104820	http://www.genome.jp/kegg-bin/show_pathway?ath00062/ath:AT3G60340%09red/ath:AT1G01710%09red/ath:AT2G26250%09red/ath:AT3G45770%09red/ath:AT2G28630%09red/ath:AT1G01120%09red/ath:AT5G47340%09red/ath:AT5G47330%09red/ath:AT4G34510%09red/ath:AT1G04220%09red/ath:AT1G19440%09red/ath:AT5G04530%09red
One carbon pool by folate	KEGG PATHWAY	ath00670	10	20	0.0593824	0.109211	BVRB_4g071540|BVRB_2g027610|BVRB_6g127540|BVRB_5g115510|BVRB_1g013210|BVRB_1g005180|BVRB_5g115860|BVRB_3g059580|BVRB_6g143730|BVRB_6g152820	http://www.genome.jp/kegg-bin/show_pathway?ath00670/ath:AT1G66520%09red/ath:AT1G50480%09red/ath:AT2G44160%09red/ath:AT5G13050%09red/ath:AT1G22020%09red/ath:AT1G11860%09red/ath:AT4G37930%09red/ath:AT5G26780%09red/ath:AT2G35040%09red
Glycosphingolipid biosynthesis - globo and isoglobo series	KEGG PATHWAY	ath00603	6	9	0.0598238	0.109211	BVRB_2g042760|BVRB_8g183680|BVRB_2g034670|BVRB_4g074520|BVRB_2g028320|BVRB_2g037090	http://www.genome.jp/kegg-bin/show_pathway?ath00603/ath:AT3G55260%09red/ath:AT5G08380%09red/ath:AT1G05590%09red/ath:AT1G61050%09red/ath:AT3G56310%09red/ath:AT1G65590%09red
Linoleic acid metabolism	KEGG PATHWAY	ath00591	6	9	0.0598238	0.109211	BVRB_3g062380|BVRB_6g151340|BVRB_7g169930|BVRB_8g198160|BVRB_4g072060|BVRB_4g081350	http://www.genome.jp/kegg-bin/show_pathway?ath00591/ath:AT2G06925%09red/ath:AT1G67560%09red/ath:AT1G17420%09red/ath:AT1G55020%09red/ath:AT5G04040%09red/ath:AT3G45140%09red
Glucosinolate biosynthesis	KEGG PATHWAY	ath00966	11	23	0.0601951	0.109211	BVRB_5g105330|BVRB_1g014510|BVRB_1g005160|BVRB_1g005100|BVRB_1g005110|BVRB_1g005130|BVRB_1g005120|BVRB_6g137390|BVRB_5g116340|BVRB_1g005140|BVRB_1g010030	http://www.genome.jp/kegg-bin/show_pathway?ath00966/ath:AT1G24100%09red/ath:AT1G10070%09red/ath:AT1G74100%09red/ath:AT5G65780%09red/ath:AT4G31500%09red
Biosynthesis of secondary metabolites - unclassified	KEGG PATHWAY	ath00999	7	12	0.0661206	0.118272	BVRB_5g107340|BVRB_2g030450|BVRB_6g150930|BVRB_004760|BVRB_9g216210|BVRB_7g175810|BVRB_9g205510	http://www.genome.jp/kegg-bin/show_pathway?ath00999/ath:AT2G30490%09red/ath:AT4G34050%09red/ath:AT4G19010%09red/ath:AT1G67980%09red/ath:AT4G05160%09red/ath:AT4G26220%09red
Riboflavin metabolism	KEGG PATHWAY	ath00740	9	18	0.0717908	0.125239	BVRB_1g004790|BVRB_4g096340|BVRB_9g210320|BVRB_8g181640|BVRB_2g033450|BVRB_4g085970|BVRB_4g082700|BVRB_4g082680|BVRB_9g202650	http://www.genome.jp/kegg-bin/show_pathway?ath00740/ath:AT1G14700%09red/ath:AT5G23330%09red/ath:AT4G20960%09red/ath:AT4G21470%09red/ath:AT2G44050%09red/ath:AT2G20690%09red/ath:AT4G11570%09red
Ether lipid metabolism	KEGG PATHWAY	ath00565	12	27	0.071988	0.125239	BVRB_2g037520|BVRB_3g062380|BVRB_1g016800|BVRB_7g176650|BVRB_2g035170|BVRB_7g176660|BVRB_3g066480|XLOC_042966|BVRB_8g194400|BVRB_8g198160|BVRB_5g101220|BVRB_9g219660	http://www.genome.jp/kegg-bin/show_pathway?ath00565/ath:AT1G13560%09red/ath:AT2G06925%09red/ath:AT2G42010%09red/ath:AT3G15730%09red/ath:AT3G03530%09red/ath:AT1G12640%09red/ath:AT1G55180%09red/ath:AT5G04040%09red
Fatty acid degradation	KEGG PATHWAY	ath00071	18	47	0.0818656	0.140499	BVRB_1g008590|BVRB_4g090610|BVRB_7g166210|BVRB_002030|BVRB_9g218160|BVRB_1g007480|BVRB_7g178220|BVRB_7g169880|BVRB_8g196760|BVRB_5g102830|BVRB_002050|BVRB_9g206140|BVRB_4g081450|BVRB_1g010740|BVRB_3g065110|BVRB_5g116750|BVRB_5g098860|BVRB_1g003210	http://www.genome.jp/kegg-bin/show_pathway?ath00071/ath:AT4G29010%09red/ath:AT1G49430%09red/ath:AT5G27600%09red/ath:AT1G22440%09red/ath:AT2G33150%09red/ath:AT4G23850%09red/ath:AT1G54100%09red/ath:AT5G48230%09red/ath:AT1G77120%09red/ath:AT3G51840%09red/ath:AT5G42250%09red/ath:AT5G47720%09red/ath:AT3G23790%09red/ath:AT1G44170%09red/ath:AT3G48000%09red/ath:AT5G43940%09red
SNARE interactions in vesicular transport	KEGG PATHWAY	ath04130	17	44	0.0847604	0.143528	BVRB_006590|BVRB_7g165050|BVRB_5g114280|BVRB_2g024020|BVRB_1g004330|BVRB_7g164890|BVRB_6g153340|BVRB_7g170750|BVRB_5g108580|BVRB_8g197430|BVRB_1g018720|BVRB_8g195700|BVRB_5g120810|BVRB_4g076580|BVRB_3g051100|BVRB_4g089310|BVRB_2g024510	http://www.genome.jp/kegg-bin/show_pathway?ath04130/ath:AT3G58170%09red/ath:AT1G79590%09red/ath:AT1G51740%09red/ath:AT3G24315%09red/ath:AT3G09740%09red/ath:AT3G11820%09red/ath:AT3G05710%09red/ath:AT2G45200%09red/ath:AT5G05760%09red/ath:AT3G29100%09red/ath:AT1G26670%09red/ath:AT3G24350%09red/ath:AT5G26980%09red/ath:AT5G22360%09red/ath:AT1G11890%09red/ath:AT2G36900%09red
Valine, leucine and isoleucine biosynthesis	KEGG PATHWAY	ath00290	10	22	0.0874986	0.146215	BVRB_1g014510|BVRB_7g161000|BVRB_3g058820|BVRB_9g219010|BVRB_3g058810|BVRB_006300|BVRB_6g137380|BVRB_6g137390|BVRB_3g059040|BVRB_006310	http://www.genome.jp/kegg-bin/show_pathway?ath00290/ath:AT5G65770%09red/ath:AT3G10050%09red/ath:AT1G80560%09red/ath:AT2G43090%09red/ath:AT1G10070%09red/ath:AT2G31810%09red/ath:AT5G65780%09red/ath:AT1G74040%09red
Basal transcription factors	KEGG PATHWAY	ath03022	20	55	0.0958992	0.156734	BVRB_9g204580|BVRB_3g058510|BVRB_2g045080|BVRB_8g201690|BVRB_2g036220|BVRB_4g078640|BVRB_7g164910|BVRB_2g027150|BVRB_9g203780|BVRB_6g137500|BVRB_4g081110|BVRB_3g055930|BVRB_3g061720|BVRB_5g121550|BVRB_4g089320|BVRB_7g173320|BVRB_006170|XLOC_004214|BVRB_5g121400|BVRB_8g191650	http://www.genome.jp/kegg-bin/show_pathway?ath03022/ath:AT1G55750%09red/ath:AT5G43130%09red/ath:AT1G03280%09red/ath:AT1G05055%09red/ath:AT4G30820%09red/ath:AT4G31720%09red/ath:AT3G10330%09red/ath:AT4G36650%09red/ath:AT1G07470%09red/ath:AT1G32750%09red/ath:AT1G02680%09red/ath:AT5G27620%09red/ath:AT4G20280%09red/ath:AT5G25150%09red/ath:AT1G04950%09red/ath:AT1G55300%09red/ath:AT1G75510%09red
Zeatin biosynthesis	KEGG PATHWAY	ath00908	13	32	0.0964933	0.156734	BVRB_4g086010|BVRB_1g006690|BVRB_9g215360|BVRB_2g033900|BVRB_3g062100|BVRB_4g077650|BVRB_7g161130|BVRB_6g134890|BVRB_3g063470|BVRB_1g008850|BVRB_1g008840|BVRB_5g102130|BVRB_3g061800	http://www.genome.jp/kegg-bin/show_pathway?ath00908/ath:AT1G22380%09red/ath:AT5G20040%09red/ath:AT1G22340%09red/ath:AT2G41510%09red/ath:AT1G22360%09red/ath:AT2G36760%09red/ath:AT1G75450%09red/ath:AT5G21482%09red/ath:AT2G36770%09red
Non-homologous end-joining	KEGG PATHWAY	ath03450	5	8	0.0974961	0.156734	BVRB_6g132480|BVRB_3g065520|BVRB_6g136150|BVRB_8g181170|BVRB_1g019280	http://www.genome.jp/kegg-bin/show_pathway?ath03450/ath:AT2G31970%09red/ath:AT1G48050%09red/ath:AT1G16970%09red/ath:AT1G10520%09red/ath:AT5G26680%09red
Ubiquitin mediated proteolysis	KEGG PATHWAY	ath04120	45	143	0.0994763	0.157919	BVRB_011950|BVRB_4g079360|BVRB_3g050110|BVRB_6g128200|BVRB_005150|BVRB_4g091840|BVRB_8g197920|BVRB_3g059750|BVRB_4g085610|BVRB_1g006850|BVRB_7g169090|BVRB_007490|BVRB_4g081090|BVRB_5g098610|BVRB_1g015130|BVRB_7g160620|BVRB_4g087020|BVRB_5g100330|BVRB_5g101740|BVRB_5g113000|BVRB_2g043770|BVRB_9g216990|BVRB_9g213970|BVRB_2g023580|BVRB_2g024990|BVRB_6g129530|BVRB_8g199840|BVRB_7g175340|BVRB_4g086990…	http://www.genome.jp/kegg-bin/show_pathway?ath04120/ath:AT4G02570%09red/ath:AT1G17280%09red/ath:AT5G50870%09red/ath:AT2G20000%09red/ath:AT3G13550%09red/ath:AT5G20570%09red/ath:AT2G32950%09red/ath:AT4G21530%09red/ath:AT1G53025%09red/ath:AT1G64230%09red/ath:AT2G04660%09red/ath:AT3G07370%09red/ath:AT1G06590%09red/ath:AT5G46210%09red/ath:AT1G75440%09red/ath:AT2G33770%09red/ath:AT2G30110%09red/ath:AT2…
Mismatch repair	KEGG PATHWAY	ath03430	15	39	0.103415	0.162145	BVRB_005250|BVRB_2g040150|BVRB_1g007540|BVRB_5g123610|BVRB_6g135740|BVRB_5g126970|BVRB_6g139950|BVRB_7g168420|BVRB_4g078990|BVRB_5g121690|BVRB_1g001770|BVRB_3g060210|BVRB_3g066900|BVRB_5g125990|BVRB_5g126110	http://www.genome.jp/kegg-bin/show_pathway?ath03430/ath:AT5G22010%09red/ath:AT2G29570%09red/ath:AT5G08020%09red/ath:AT3G18524%09red/ath:AT1G21690%09red/ath:AT1G77470%09red/ath:AT4G35520%09red/ath:AT5G63960%09red/ath:AT2G42120%09red/ath:AT4G02070%09red/ath:AT4G09140%09red/ath:AT4G25540%09red/ath:AT3G18580%09red/ath:AT5G27740%09red
Taurine and hypotaurine metabolism	KEGG PATHWAY	ath00430	7	14	0.106336	0.164691	BVRB_8g188810|BVRB_5g109770|BVRB_1g023250|BVRB_6g131780|BVRB_6g131750|BVRB_2g047160|BVRB_9g214920	http://www.genome.jp/kegg-bin/show_pathway?ath00430/ath:AT5G39890%09red/ath:AT2G02010%09red/ath:AT1G65960%09red/ath:AT5G15120%09red/ath:AT5G17330%09red
Homologous recombination	KEGG PATHWAY	ath03440	23	67	0.114765	0.175604	BVRB_8g191150|BVRB_5g123610|BVRB_5g121570|BVRB_9g218770|BVRB_5g117140|BVRB_5g117150|BVRB_9g219910|BVRB_2g033250|BVRB_4g078990|BVRB_7g174630|BVRB_7g165610|BVRB_5g125990|BVRB_008280|BVRB_4g078790|BVRB_1g014480|BVRB_004940|BVRB_3g060210|BVRB_1g010110|BVRB_3g065520|BVRB_9g219470|BVRB_7g168420|BVRB_6g133530|BVRB_2g044610	http://www.genome.jp/kegg-bin/show_pathway?ath03440/ath:AT1G20720%09red/ath:AT5G20850%09red/ath:AT5G20420%09red/ath:AT5G08020%09red/ath:AT3G19210%09red/ath:AT1G07745%09red/ath:AT1G77320%09red/ath:AT2G22140%09red/ath:AT5G63960%09red/ath:AT2G42120%09red/ath:AT4G02110%09red/ath:AT3G48190%09red/ath:AT4G32960%09red/ath:AT1G04020%09red/ath:AT5G64520%09red/ath:AT2G31970%09red/ath:AT1G10930%09red/ath:AT5…
Lysine degradation	KEGG PATHWAY	ath00310	13	34	0.126912	0.191879	BVRB_4g090610|BVRB_5g116750|BVRB_2g045290|BVRB_3g062010|BVRB_4g094880|BVRB_7g169880|BVRB_1g007480|BVRB_9g206140|BVRB_5g106820|BVRB_8g191190|BVRB_1g017910|BVRB_3g062020|BVRB_9g207620	http://www.genome.jp/kegg-bin/show_pathway?ath00310/ath:AT2G24580%09red/ath:AT1G54100%09red/ath:AT5G48230%09red/ath:AT5G04940%09red/ath:AT4G33150%09red/ath:AT5G47720%09red/ath:AT4G15180%09red/ath:AT2G22740%09red/ath:AT2G23380%09red/ath:AT3G48000%09red/ath:AT1G44170%09red
Glycosylphosphatidylinositol (GPI)-anchor biosynthesis	KEGG PATHWAY	ath00563	10	25	0.142347	0.212548	BVRB_1g011860|BVRB_5g100990|BVRB_7g167910|BVRB_1g011680|BVRB_5g099600|BVRB_7g167820|BVRB_4g078980|BVRB_013220|BVRB_3g062330|BVRB_8g197500	http://www.genome.jp/kegg-bin/show_pathway?ath00563/ath:AT3G01380%09red/ath:AT5G14850%09red/ath:AT3G57170%09red/ath:AT2G39445%09red/ath:AT5G17250%09red/ath:AT5G19130%09red/ath:AT3G07140%09red/ath:AT1G63110%09red/ath:AT1G16040%09red/ath:AT3G07180%09red
Steroid biosynthesis	KEGG PATHWAY	ath00100	13	35	0.14393	0.212548	BVRB_6g128510|BVRB_1g017310|BVRB_3g062380|BVRB_2g027040|BVRB_5g108410|BVRB_5g101900|BVRB_5g101910|BVRB_9g216620|BVRB_9g216610|BVRB_001630|BVRB_2g029170|BVRB_8g193510|BVRB_1g014580	http://www.genome.jp/kegg-bin/show_pathway?ath00100/ath:AT1G58440%09red/ath:AT4G12110%09red/ath:AT3G02580%09red/ath:AT2G34500%09red/ath:AT1G11680%09red/ath:AT5G13710%09red/ath:AT1G20050%09red/ath:AT5G04040%09red/ath:AT2G07050%09red/ath:AT4G34640%09red
Carotenoid biosynthesis	KEGG PATHWAY	ath00906	11	29	0.156933	0.221363	BVRB_4g094240|BVRB_5g107230|BVRB_3g053400|BVRB_003280|BVRB_4g080760|BVRB_004050|BVRB_3g055220|BVRB_4g071240|BVRB_4g071260|BVRB_1g018290|XLOC_064494	http://www.genome.jp/kegg-bin/show_pathway?ath00906/ath:AT4G19170%09red/ath:AT5G17230%09red/ath:AT1G52340%09red/ath:AT2G44990%09red/ath:AT3G19270%09red/ath:AT4G25700%09red/ath:AT1G31800%09red/ath:AT1G30100%09red
Proteasome	KEGG PATHWAY	ath03050	20	60	0.157951	0.221363	BVRB_9g204780|BVRB_7g178430|BVRB_6g130470|BVRB_5g105640|BVRB_9g208290|BVRB_3g067650|BVRB_8g195300|BVRB_015890|BVRB_3g062770|BVRB_6g151140|BVRB_2g035910|BVRB_3g055480|BVRB_5g109760|BVRB_5g120410|BVRB_5g125850|BVRB_5g125170|BVRB_7g163830|BVRB_2g024160|BVRB_5g107830|BVRB_2g035270	http://www.genome.jp/kegg-bin/show_pathway?ath03050/ath:AT3G53970%09red/ath:AT3G22630%09red/ath:AT1G79210%09red/ath:AT5G19990%09red/ath:AT5G38650%09red/ath:AT1G64520%09red/ath:AT1G53750%09red/ath:AT4G19006%09red/ath:AT2G27020%09red/ath:AT4G31300%09red/ath:AT4G38630%09red/ath:AT1G29150%09red/ath:AT3G26340%09red/ath:AT5G05780%09red/ath:AT4G24820%09red/ath:AT2G26590%09red/ath:AT3G05530%09red/ath:AT3…
Porphyrin and chlorophyll metabolism	KEGG PATHWAY	ath00860	18	53	0.158032	0.221363	BVRB_1g010560|BVRB_5g101280|BVRB_4g094680|BVRB_4g083780|BVRB_2g041980|BVRB_2g046990|BVRB_8g196400|BVRB_3g061530|BVRB_2g044390|BVRB_010880|BVRB_1g007390|BVRB_5g118890|BVRB_9g206230|BVRB_5g102920|BVRB_5g114670|BVRB_2g029980|BVRB_9g219840|BVRB_2g033330	http://www.genome.jp/kegg-bin/show_pathway?ath00860/ath:AT1G69740%09red/ath:AT5G18660%09red/ath:AT1G04620%09red/ath:AT4G11910%09red/ath:AT4G03240%09red/ath:AT4G13250%09red/ath:AT1G74470%09red/ath:AT5G14220%09red/ath:AT5G13630%09red/ath:AT1G50170%09red/ath:AT5G26710%09red/ath:AT5G26030%09red/ath:AT2G40490%09red/ath:AT3G44880%09red/ath:AT1G44000%09red/ath:AT2G44520%09red/ath:AT3G51820%09red/ath:AT2…
Glycosaminoglycan degradation	KEGG PATHWAY	ath00531	4	7	0.159056	0.221363	BVRB_2g028320|BVRB_2g029090|BVRB_4g074520|BVRB_2g037090	http://www.genome.jp/kegg-bin/show_pathway?ath00531/ath:AT1G05590%09red/ath:AT1G65590%09red/ath:AT5G13690%09red/ath:AT3G55260%09red
C5-Branched dibasic acid metabolism	KEGG PATHWAY	ath00660	4	7	0.159056	0.221363	BVRB_9g219010|BVRB_006310|BVRB_006300|BVRB_3g059040	http://www.genome.jp/kegg-bin/show_pathway?ath00660/ath:AT2G31810%09red/ath:AT1G80560%09red/ath:AT2G43090%09red
Other types of O-glycan biosynthesis	KEGG PATHWAY	ath00514	6	13	0.160358	0.221363	BVRB_015190|BVRB_4g073690|BVRB_3g065310|BVRB_2g041690|BVRB_5g102380|BVRB_4g077080	http://www.genome.jp/kegg-bin/show_pathway?ath00514/ath:AT5G13500%09red/ath:AT3G04240%09red/ath:AT2G35610%09red/ath:AT3G11540%09red
Propanoate metabolism	KEGG PATHWAY	ath00640	15	43	0.164709	0.224925	BVRB_4g090610|BVRB_5g122810|BVRB_8g187780|BVRB_8g195840|BVRB_7g156800|BVRB_3g067170|BVRB_008350|BVRB_5g102830|BVRB_6g152330|BVRB_9g206140|BVRB_9g207660|BVRB_1g018350|BVRB_8g185570|BVRB_1g012740|BVRB_1g010630	http://www.genome.jp/kegg-bin/show_pathway?ath00640/ath:AT3G06850%09red/ath:AT1G36160%09red/ath:AT4G04320%09red/ath:AT4G17260%09red/ath:AT1G21400%09red/ath:AT4G13360%09red/ath:AT5G48230%09red/ath:AT5G35360%09red/ath:AT3G51840%09red/ath:AT2G38040%09red/ath:ArthCp031%09red/ath:AT5G47720%09red/ath:AT4G20930%09red/ath:AT3G60510%09red/ath:AT5G36880%09red
Phagosome	KEGG PATHWAY	ath04145	26	82	0.166596	0.225082	BVRB_1g000560|BVRB_4g074880|BVRB_9g217600|BVRB_6g130240|BVRB_6g148700|BVRB_9g216880|BVRB_011660|BVRB_5g120240|BVRB_4g074640|BVRB_1g004960|BVRB_1g012390|BVRB_8g181270|BVRB_8g197430|BVRB_5g116510|BVRB_2g024510|BVRB_4g092050|BVRB_2g031820|BVRB_9g206620|BVRB_3g066890|BVRB_5g107520|BVRB_5g115110|BVRB_9g223320|BVRB_8g192340|BVRB_1g018440|BVRB_5g099500|BVRB_7g172940	http://www.genome.jp/kegg-bin/show_pathway?ath04145/ath:AT3G60540%09red/ath:AT1G08450%09red/ath:AT4G39080%09red/ath:AT4G02620%09red/ath:AT1G11890%09red/ath:AT2G28520%09red/ath:AT5G62880%09red/ath:AT5G23860%09red/ath:AT3G01390%09red/ath:AT1G50010%09red/ath:AT2G18710%09red/ath:AT3G42050%09red/ath:AT3G18820%09red/ath:AT2G17800%09red/ath:AT1G12840%09red/ath:AT1G19910%09red/ath:AT1G34260%09red/ath:AT1…
Sesquiterpenoid and triterpenoid biosynthesis	KEGG PATHWAY	ath00909	9	23	0.170987	0.228583	BVRB_6g128510|BVRB_7g177970|BVRB_4g092540|BVRB_1g014580|BVRB_7g177990|BVRB_9g216610|BVRB_1g012790|BVRB_9g216620|BVRB_4g085480	http://www.genome.jp/kegg-bin/show_pathway?ath00909/ath:AT1G58440%09red/ath:AT5G23960%09red/ath:AT4G33360%09red/ath:AT1G78955%09red/ath:AT1G78950%09red/ath:AT4G34640%09red
Arachidonic acid metabolism	KEGG PATHWAY	ath00590	7	17	0.185631	0.245575	BVRB_3g062380|BVRB_2g044150|BVRB_7g162820|BVRB_1g020740|BVRB_8g198160|BVRB_5g123260|XLOC_017187	http://www.genome.jp/kegg-bin/show_pathway?ath00590/ath:AT4G11600%09red/ath:AT5G42150%09red/ath:AT2G06925%09red/ath:AT4G31870%09red/ath:AT2G48150%09red/ath:AT2G43350%09red/ath:AT5G04040%09red
Glycosphingolipid biosynthesis - ganglio series	KEGG PATHWAY	ath00604	3	5	0.201019	0.261275	BVRB_2g028320|BVRB_4g074520|BVRB_2g037090	http://www.genome.jp/kegg-bin/show_pathway?ath00604/ath:AT1G05590%09red/ath:AT1G65590%09red/ath:AT3G55260%09red
Brassinosteroid biosynthesis	KEGG PATHWAY	ath00905	4	8	0.202936	0.261275	BVRB_7g176680|BVRB_2g028060|BVRB_8g195420|BVRB_2g023920	http://www.genome.jp/kegg-bin/show_pathway?ath00905/ath:AT2G38050%09red/ath:AT3G30180%09red/ath:AT5G05690%09red/ath:AT3G13730%09red
Citrate cycle (TCA cycle)	KEGG PATHWAY	ath00020	20	63	0.203671	0.261275	BVRB_9g210550|BVRB_5g124340|XLOC_039551|BVRB_2g038890|BVRB_6g128670|BVRB_6g152970|BVRB_6g133460|BVRB_3g068040|BVRB_4g073530|BVRB_9g217610|BVRB_2g037990|BVRB_1g015750|BVRB_3g049020|BVRB_1g010250|BVRB_6g137210|BVRB_9g205130|BVRB_3g059870|BVRB_6g152160|BVRB_9g219850|BVRB_002340	http://www.genome.jp/kegg-bin/show_pathway?ath00020/ath:AT1G04410%09red/ath:AT4G35650%09red/ath:AT5G50950%09red/ath:AT5G40650%09red/ath:AT5G14590%09red/ath:AT2G44350%09red/ath:AT5G50850%09red/ath:AT1G01090%09red/ath:AT1G09430%09red/ath:AT3G58750%09red/ath:AT4G37870%09red/ath:AT3G47520%09red/ath:AT3G55410%09red/ath:AT5G66760%09red/ath:AT2G22780%09red/ath:AT1G65930%09red/ath:AT3G52200%09red
Phenylalanine, tyrosine and tryptophan biosynthesis	KEGG PATHWAY	ath00400	18	56	0.206886	0.262746	BVRB_2g040030|BVRB_7g172430|BVRB_7g172410|BVRB_6g149930|BVRB_9g225780|BVRB_8g200230|BVRB_6g130250|BVRB_4g083140|BVRB_2g047840|BVRB_5g117310|BVRB_8g196670|BVRB_2g026140|BVRB_9g209080|BVRB_5g120250|BVRB_5g112760|BVRB_005450|BVRB_1g018980|BVRB_2g031080	http://www.genome.jp/kegg-bin/show_pathway?ath00400/ath:AT2G29690%09red/ath:AT5G17990%09red/ath:AT1G69370%09red/ath:AT2G45300%09red/ath:AT5G36160%09red/ath:AT5G11520%09red/ath:AT4G27070%09red/ath:AT4G31990%09red/ath:AT5G66120%09red/ath:AT3G06350%09red/ath:AT2G21940%09red/ath:AT1G07780%09red/ath:AT5G38530%09red/ath:AT4G02610%09red/ath:AT2G30970%09red/ath:AT5G19550%09red
Pantothenate and CoA biosynthesis	KEGG PATHWAY	ath00770	10	28	0.211098	0.26544	BVRB_1g014510|BVRB_6g148730|BVRB_7g167060|BVRB_2g045950|BVRB_9g221490|BVRB_6g137380|BVRB_6g137390|BVRB_3g059040|BVRB_5g117180|BVRB_4g073850	http://www.genome.jp/kegg-bin/show_pathway?ath00770/ath:AT5G65770%09red/ath:AT5G12200%09red/ath:AT5G64370%09red/ath:AT3G17810%09red/ath:AT1G10070%09red/ath:AT2G31810%09red/ath:AT5G65780%09red/ath:AT4G32180%09red/ath:AT5G48840%09red
Histidine metabolism	KEGG PATHWAY	ath00340	7	18	0.216308	0.269324	BVRB_5g116750|BVRB_4g097150|BVRB_1g007480|BVRB_7g169880|BVRB_1g010010|BVRB_9g217040|BVRB_1g011320	http://www.genome.jp/kegg-bin/show_pathway?ath00340/ath:AT1G54100%09red/ath:AT3G22425%09red/ath:AT4G39120%09red/ath:AT1G43710%09red/ath:AT3G48000%09red/ath:AT1G44170%09red
Vitamin B6 metabolism	KEGG PATHWAY	ath00750	6	15	0.227256	0.280208	BVRB_9g211330|BVRB_9g211320|BVRB_9g211300|BVRB_7g172100|BVRB_6g130780|BVRB_7g165390	http://www.genome.jp/kegg-bin/show_pathway?ath00750/ath:AT5G01410%09red/ath:AT1G73010%09red/ath:AT4G29840%09red/ath:AT2G17630%09red/ath:AT1G17710%09red
Cyanoamino acid metabolism	KEGG PATHWAY	ath00460	21	69	0.242955	0.29386	BVRB_4g092420|BVRB_5g110070|BVRB_8g200320|BVRB_8g189070|BVRB_7g163940|BVRB_7g170820|BVRB_6g143730|BVRB_1g005180|BVRB_8g189010|BVRB_5g119580|BVRB_7g172650|BVRB_5g113530|BVRB_6g152820|BVRB_5g110540|BVRB_1g015650|BVRB_7g163900|BVRB_6g128010|BVRB_6g128000|BVRB_1g004430|BVRB_7g172630|BVRB_4g074620	http://www.genome.jp/kegg-bin/show_pathway?ath00460/ath:AT3G61440%09red/ath:AT4G37560%09red/ath:AT3G16150%09red/ath:AT5G20950%09red/ath:AT5G22300%09red/ath:AT5G36890%09red/ath:AT1G73050%09red/ath:AT3G47010%09red/ath:AT1G61820%09red/ath:AT1G22020%09red/ath:AT5G26780%09red/ath:AT5G54570%09red/ath:AT3G47050%09red/ath:AT4G37930%09red/ath:AT5G04885%09red/ath:AT3G60130%09red/ath:AT5G08100%09red/ath:AT1…
Nucleotide excision repair	KEGG PATHWAY	ath03420	21	69	0.242955	0.29386	BVRB_7g176050|BVRB_1g006680|BVRB_4g097200|BVRB_7g164910|BVRB_005250|BVRB_6g132960|BVRB_001380|BVRB_2g040150|BVRB_1g007540|BVRB_5g123610|BVRB_003620|BVRB_9g203780|BVRB_3g060210|BVRB_4g081110|BVRB_5g126970|BVRB_6g139950|BVRB_7g168420|BVRB_4g078990|BVRB_006170|BVRB_8g191650|BVRB_1g015130	http://www.genome.jp/kegg-bin/show_pathway?ath03420/ath:AT5G22010%09red/ath:AT2G29570%09red/ath:AT1G21690%09red/ath:AT5G08020%09red/ath:AT2G42120%09red/ath:AT5G46210%09red/ath:AT1G05055%09red/ath:AT3G05210%09red/ath:AT1G77470%09red/ath:AT5G16630%09red/ath:AT2G27470%09red/ath:AT5G63960%09red/ath:AT5G20570%09red/ath:AT4G30820%09red/ath:AT5G27620%09red/ath:AT1G55750%09red/ath:AT1G27840%09red/ath:AT3…
Other glycan degradation	KEGG PATHWAY	ath00511	7	19	0.248638	0.297897	BVRB_9g223630|BVRB_6g151860|BVRB_3g067970|BVRB_6g130460|BVRB_4g074520|BVRB_2g028320|BVRB_2g037090	http://www.genome.jp/kegg-bin/show_pathway?ath00511/ath:AT3G55260%09red/ath:AT5G66150%09red/ath:AT3G26720%09red/ath:AT1G05590%09red/ath:AT1G65590%09red/ath:AT4G34260%09red/ath:AT5G61540%09red
Phosphonate and phosphinate metabolism	KEGG PATHWAY	ath00440	3	6	0.259332	0.307805	BVRB_8g198120|BVRB_2g035170|BVRB_7g165520	http://www.genome.jp/kegg-bin/show_pathway?ath00440/ath:AT2G38670%09red/ath:AT1G13560%09red
Sulfur metabolism	KEGG PATHWAY	ath00920	12	42	0.386846	0.454902	BVRB_6g131970|BVRB_4g072790|BVRB_3g058740|BVRB_8g186000|BVRB_4g087280|BVRB_8g181410|BVRB_4g090050|BVRB_4g094020|BVRB_1g004430|BVRB_1g022240|BVRB_009820|BVRB_2g040350	http://www.genome.jp/kegg-bin/show_pathway?ath00920/ath:AT3G61440%09red/ath:AT1G53580%09red/ath:AT3G22890%09red/ath:AT5G04590%09red/ath:AT2G43750%09red/ath:AT1G19920%09red/ath:AT5G54390%09red/ath:AT3G01910%09red/ath:AT3G01120%09red/ath:AT4G04610%09red/ath:AT4G05090%09red/ath:AT3G13110%09red
Biotin metabolism	KEGG PATHWAY	ath00780	5	16	0.409724	0.477385	BVRB_2g030800|BVRB_9g214940|BVRB_003100|BVRB_8g190580|BVRB_9g204520	http://www.genome.jp/kegg-bin/show_pathway?ath00780/ath:AT5G46290%09red/ath:AT5G10160%09red/ath:AT5G04620%09red/ath:AT2G04540%09red/ath:AT1G74960%09red
Ribosome	KEGG PATHWAY	ath03010	92	364	0.461393	0.532699	BVRB_4g085270|BVRB_042230|BVRB_4g097450|BVRB_2g033650|BVRB_7g159160|BVRB_3g064990|BVRB_004290|BVRB_1g016890|BVRB_7g171380|BVRB_4g093640|BVRB_2g047110|BVRB_5g107380|BVRB_5g103220|BVRB_8g199050|BVRB_1g008640|BVRB_9g214660|BVRB_6g132100|BVRB_2g031760|BVRB_2g025920|BVRB_6g154860|BVRB_1g007100|BVRB_019360|BVRB_3g051510|BVRB_4g093650|BVRB_7g170480|BVRB_2g028990|BVRB_4g077850|BVRB_8g182860|BVRB_9g204940…	http://www.genome.jp/kegg-bin/show_pathway?ath03010/ath:AT3G16780%09red/ath:AT4G28360%09red/ath:AT5G40950%09red/ath:AT4G25740%09red/ath:AT5G59850%09red/ath:AT2G20060%09red/ath:AT2G24090%09red/ath:AT3G16080%09red/ath:ArthCp011%09red/ath:AT1G70190%09red/ath:ArthCp059%09red/ath:ArthCp058%09red/ath:AT1G09590%09red/ath:AT2G36620%09red/ath:AT5G58420%09red/ath:AT3G04840%09red/ath:ArthCp056%09red/ath:AT5…
Limonene and pinene degradation	KEGG PATHWAY	ath00903	2	6	0.493961	0.556306	BVRB_5g116750|BVRB_1g007480	http://www.genome.jp/kegg-bin/show_pathway?ath00903/ath:AT3G48000%09red/ath:AT1G44170%09red
Folate biosynthesis	KEGG PATHWAY	ath00790	7	26	0.494217	0.556306	BVRB_3g059450|BVRB_3g052490|BVRB_2g025580|BVRB_9g219130|BVRB_4g085320|BVRB_013520|BVRB_6g145800	http://www.genome.jp/kegg-bin/show_pathway?ath00790/ath:AT2G28880%09red/ath:AT2G31955%09red/ath:AT5G41480%09red/ath:AT1G16540%09red/ath:AT1G78680%09red/ath:AT5G05980%09red/ath:AT3G07270%09red
Monobactam biosynthesis	KEGG PATHWAY	ath00261	4	14	0.494981	0.556306	BVRB_1g022240|BVRB_009820|BVRB_3g050790|BVRB_3g053090	http://www.genome.jp/kegg-bin/show_pathway?ath00261/ath:AT4G19710%09red/ath:AT1G19920%09red/ath:AT3G22890%09red/ath:AT3G60880%09red
Cutin, suberine and wax biosynthesis	KEGG PATHWAY	ath00073	8	31	0.525882	0.585851	BVRB_4g084040|BVRB_3g064390|BVRB_6g131050|BVRB_7g176370|BVRB_5g100400|BVRB_1g017100|BVRB_8g191790|BVRB_3g056370	http://www.genome.jp/kegg-bin/show_pathway?ath00073/ath:AT4G33790%09red/ath:AT3G11980%09red/ath:AT5G41040%09red/ath:AT5G37300%09red/ath:AT1G02205%09red/ath:AT2G33380%09red/ath:AT1G70670%09red/ath:AT2G45970%09red
Autophagy - other	KEGG PATHWAY	ath04136	10	40	0.549801	0.607171	BVRB_5g120960|BVRB_5g118950|BVRB_5g122250|BVRB_8g186120|BVRB_6g148700|BVRB_3g069520|BVRB_3g051790|BVRB_3g059550|BVRB_1g003180|BVRB_3g050480	http://www.genome.jp/kegg-bin/show_pathway?ath04136/ath:AT3G61710%09red/ath:AT3G49590%09red/ath:AT3G15580%09red/ath:AT5G53000%09red/ath:AT2G44140%09red/ath:AT2G31260%09red/ath:AT3G07525%09red/ath:AT2G05630%09red/ath:AT1G60490%09red
AGE-RAGE signaling pathway in diabetic complications	KEGG PATHWAY	ath04933	5	20	0.5748	0.629307	BVRB_5g116510|BVRB_7g172080|BVRB_7g172070|BVRB_6g130240|BVRB_2g023760	http://www.genome.jp/kegg-bin/show_pathway?ath04933/ath:AT2G40116%09red/ath:AT5G58700%09red/ath:AT5G62880%09red/ath:AT2G17800%09red
Ubiquinone and other terpenoid-quinone biosynthesis	KEGG PATHWAY	ath00130	9	38	0.609684	0.661794	BVRB_6g144770|BVRB_5g107340|BVRB_3g068510|BVRB_9g225780|BVRB_011380|BVRB_7g175810|BVRB_3g049450|BVRB_5g103790|BVRB_9g205510	http://www.genome.jp/kegg-bin/show_pathway?ath00130/ath:AT2G30490%09red/ath:AT5G08740%09red/ath:AT5G36160%09red/ath:AT5G57300%09red/ath:AT4G36750%09red/ath:AT4G19010%09red/ath:AT3G11945%09red/ath:AT1G64970%09red/ath:AT4G05160%09red
Nitrogen metabolism	KEGG PATHWAY	ath00910	10	43	0.629445	0.677454	BVRB_8g194450|BVRB_001510|BVRB_3g052140|BVRB_1g000370|BVRB_3g048570|BVRB_7g159420|BVRB_7g179180|BVRB_3g056180|BVRB_6g128010|BVRB_6g128000	http://www.genome.jp/kegg-bin/show_pathway?ath00910/ath:AT5G53460%09red/ath:AT4G20990%09red/ath:AT3G23490%09red/ath:AT5G18170%09red/ath:AT3G01500%09red/ath:AT1G37130%09red/ath:AT4G37560%09red/ath:AT5G35630%09red/ath:AT3G52720%09red
Diterpenoid biosynthesis	KEGG PATHWAY	ath00904	5	22	0.647579	0.691113	BVRB_9g216050|BVRB_7g178650|BVRB_011460|BVRB_5g122520|BVRB_5g104770	http://www.genome.jp/kegg-bin/show_pathway?ath00904/ath:AT4G25420%09red/ath:AT1G79460%09red/ath:AT1G05160%09red/ath:AT1G02400%09red/ath:AT3G25180%09red
Selenocompound metabolism	KEGG PATHWAY	ath00450	4	18	0.66408	0.699288	BVRB_5g109920|BVRB_1g022240|BVRB_009820|BVRB_2g040350	http://www.genome.jp/kegg-bin/show_pathway?ath00450/ath:AT5G17920%09red/ath:AT1G19920%09red/ath:AT3G01120%09red/ath:AT3G22890%09red
Sphingolipid metabolism	KEGG PATHWAY	ath00600	6	27	0.666251	0.699288	BVRB_6g154080|BVRB_8g199810|BVRB_8g201320|BVRB_2g042760|BVRB_2g034670|XLOC_011720	http://www.genome.jp/kegg-bin/show_pathway?ath00600/ath:AT1G14290%09red/ath:AT4G22330%09red/ath:AT5G08380%09red/ath:AT3G56310%09red/ath:AT5G19200%09red/ath:AT4G21540%09red
Biosynthesis of unsaturated fatty acids	KEGG PATHWAY	ath01040	5	24	0.711944	0.741123	BVRB_7g178220|BVRB_4g071650|BVRB_5g102830|BVRB_1g004750|BVRB_4g074670	http://www.genome.jp/kegg-bin/show_pathway?ath01040/ath:AT1G01710%09red/ath:AT3G02630%09red/ath:AT2G33150%09red/ath:AT3G12120%09red/ath:AT3G51840%09red
Sulfur relay system	KEGG PATHWAY	ath04122	2	13	0.830764	0.857781	BVRB_3g059450|BVRB_1g020060	http://www.genome.jp/kegg-bin/show_pathway?ath04122/ath:AT3G61113%09red/ath:AT2G31955%09red
Lysine biosynthesis	KEGG PATHWAY	ath00300	2	15	0.880039	0.90133	BVRB_3g050790|BVRB_3g053090	http://www.genome.jp/kegg-bin/show_pathway?ath00300/ath:AT4G19710%09red/ath:AT3G60880%09red
Pentose and glucuronate interconversions	KEGG PATHWAY	ath00040	18	96	0.89137	0.905632	BVRB_5g114350|BVRB_2g040240|BVRB_9g224400|BVRB_7g176940|BVRB_7g167180|BVRB_6g129850|BVRB_7g157420|BVRB_4g096640|BVRB_006250|BVRB_8g198830|BVRB_008970|BVRB_7g163520|BVRB_8g191180|BVRB_4g074540|BVRB_008960|BVRB_3g066230|BVRB_7g167220|BVRB_3g069240	http://www.genome.jp/kegg-bin/show_pathway?ath00040/ath:AT2G43870%09red/ath:AT5G51970%09red/ath:AT4G13710%09red/ath:AT5G04310%09red/ath:AT2G21370%09red/ath:AT5G57655%09red/ath:AT4G02330%09red/ath:AT5G17310%09red/ath:AT5G61410%09red/ath:AT4G33220%09red/ath:AT4G24780%09red/ath:AT3G55140%09red/ath:AT5G19730%09red/ath:AT5G49650%09red/ath:AT3G53190%09red/ath:AT3G29090%09red
ABC transporters	KEGG PATHWAY	ath02010	3	26	0.94678	0.954294	BVRB_6g155350|BVRB_9g217640|BVRB_000680	http://www.genome.jp/kegg-bin/show_pathway?ath02010/ath:AT5G58270%09red/ath:AT1G27940%09red/ath:AT1G02520%09red
Aminoacyl-tRNA biosynthesis	KEGG PATHWAY	ath00970	14	115	0.997966	0.997966	BVRB_6g141670|BVRB_2g027610|BVRB_1g009650|BVRB_3g069700|BVRB_4g070900|BVRB_5g115640|BVRB_2g032960|BVRB_7g162780|BVRB_7g161530|BVRB_5g118890|BVRB_3g057540|BVRB_2g046160|BVRB_8g185660|BVRB_4g076900	http://www.genome.jp/kegg-bin/show_pathway?ath00970/ath:AT5G38830%09red/ath:AT2G33840%09red/ath:AT5G26710%09red/ath:AT4G04350%09red/ath:AT3G02760%09red/ath:AT4G32915%09red/ath:AT5G52520%09red/ath:AT1G66520%09red/ath:AT3G13490%09red/ath:AT3G11710%09red/ath:AT3G62120%09red/ath:AT3G04600%09red/ath:AT4G26300%09red/ath:AT3G46100%09red
--------------------
#Term	Database	ID	Input number	Background number	P-Value	Corrected P-Value	Input	Hyperlink
--------------------
#Term	Database	ID	Input number	Background number	P-Value	Corrected P-Value	Input	Hyperlink
--------------------
